# Supplementary material for: Noncanonical roles of ATG5 and membrane atg8ylation in retromer assembly and function
Source: eLife journal article supplement (doi:10.7554/elife.100928), 2024-09-02

## LOW EXPOSURE

1 and 2 : CO-IP Samples  
3 and 4 : Input Samples

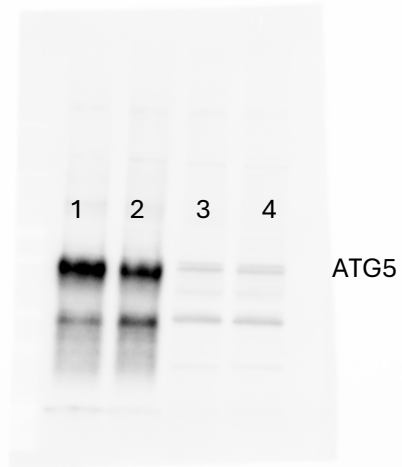

## HIGH EXPOSURE

1 and 2 : CO-IP Samples  
3 and 4 : Input Samples

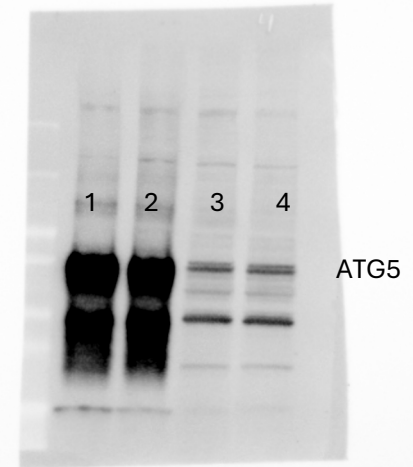

Supplement: fig1-data1 [file elife-100928-fig1-data1-v1.zip]
