# Supplementary material for: Noncanonical roles of ATG5 and membrane atg8ylation in retromer assembly and function
Source: eLife journal article supplement (doi:10.7554/elife.100928), 2024-09-02
Supplement: fig4-figsupp1-data1 [file elife-100928-fig4-figsupp1-data1-v1.zip]

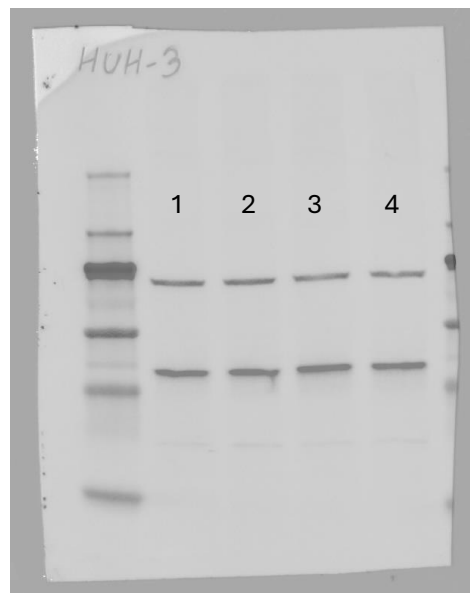

**Lane Details:**

Lane 1 : Huh7 WT  
 Lane 2 : Huh7 ATG3<sup>KO</sup>  
 Lane 3 : Huh7 ATG5<sup>KO</sup>  
 Lane 4 : Huh7 ATG7<sup>KO</sup>

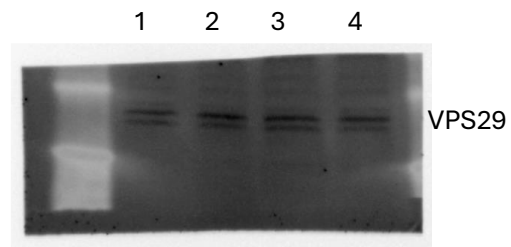

**Lane Details:**

Lane 1 : Huh7 WT  
 Lane 2 : Huh7 ATG3<sup>KO</sup>  
 Lane 3 : Huh7 ATG5<sup>KO</sup>  
 Lane 4 : Huh7 ATG7<sup>KO</sup>

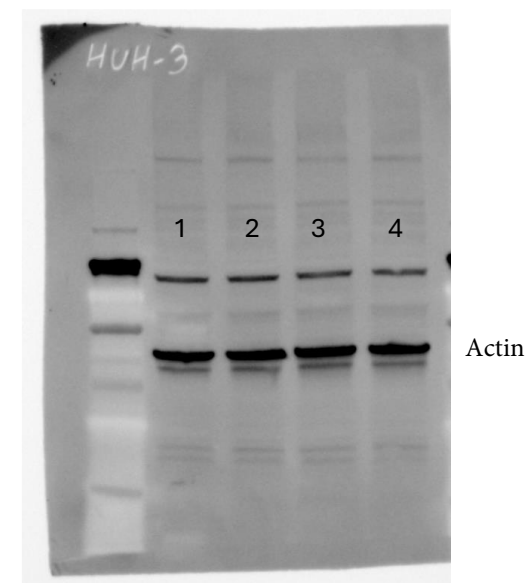

**Lane Details:**

Lane 1 : Huh7 WT  
 Lane 2 : Huh7 ATG3<sup>KO</sup>  
 Lane 3 : Huh7 ATG5<sup>KO</sup>  
 Lane 4 : Huh7 ATG7<sup>KO</sup>
