# Supplementary material for: Noncanonical roles of ATG5 and membrane atg8ylation in retromer assembly and function
Source: eLife journal article supplement (doi:10.7554/elife.100928), 2024-09-02

1 to 5 : CO-IP Samples  
6 to 10 : Input Samples

**Transfection details:**

Lane 1 : pDEST eGFP

Lane 2-5 : pDEST eGFP-LC3A

**Treatment details:**

Lane 1 and 2 : No treatment

Lane 3 : Bafilomycin(100nM)

Lane 4 : LLOMe (100uM)

Lane 5 : Monensin (100uM)

**Treatment duration:**

The treatment was given for 45 minutes

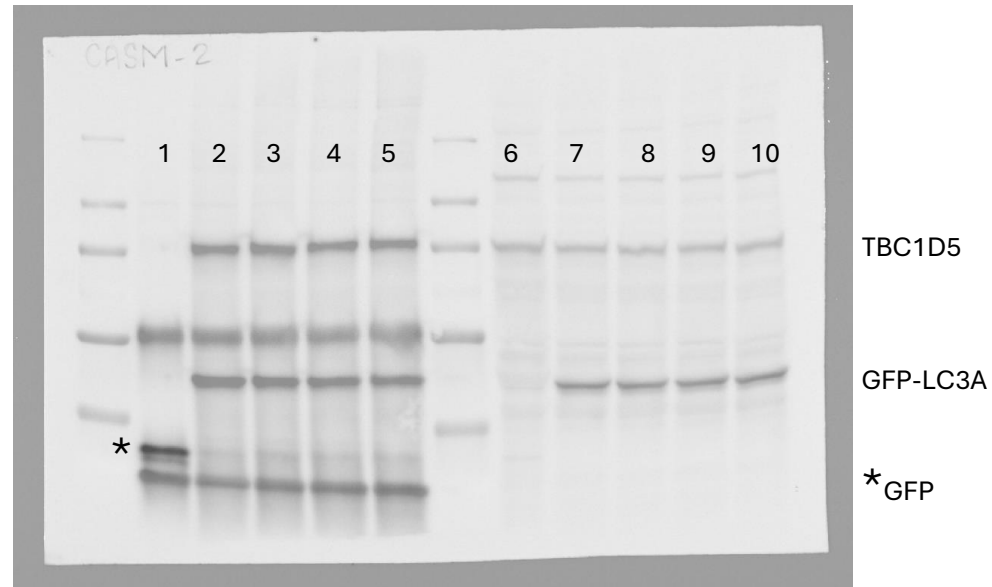

Supplement: fig7-figsupp1-data1 [file elife-100928-fig7-figsupp1-data1-v1.zip]
