# Supplementary material for: Noncanonical roles of ATG5 and membrane atg8ylation in retromer assembly and function
Source: eLife journal article supplement (doi:10.7554/elife.100928), 2024-09-02
Supplement: fig8-figsupp3-data1 [file elife-100928-fig8-figsupp3-data1-v1.zip]

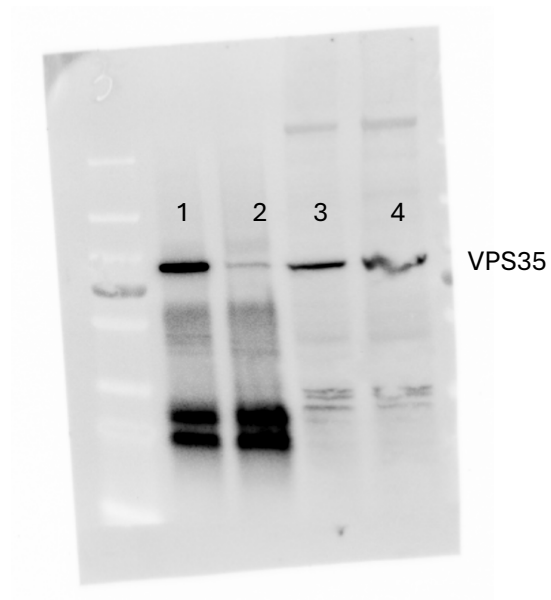

1 and 2 : CO-IP Samples  
3 and 4 : Input Samples

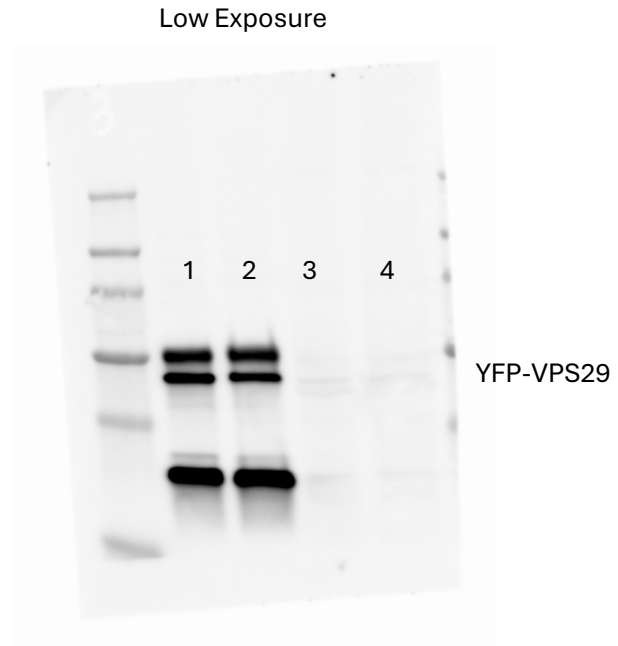

1 and 2 : CO-IP Samples  
3 and 4 : Input Samples

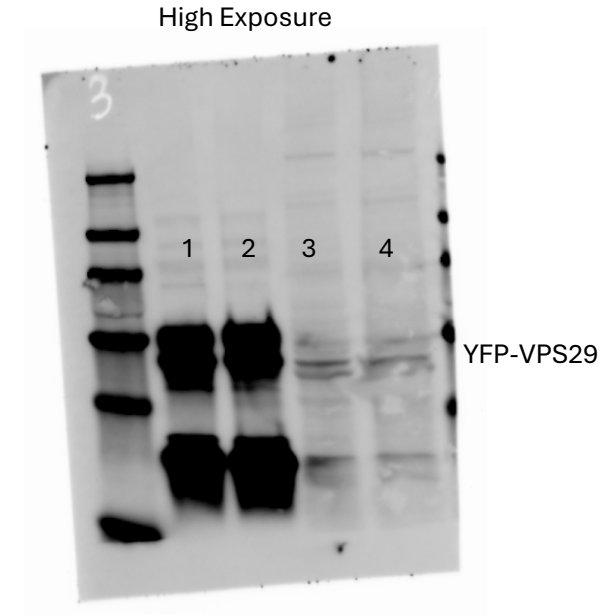

1 and 2 : CO-IP Samples  
3 and 4 : Input Samples
