# Supplementary material for: Noncanonical roles of ATG5 and membrane atg8ylation in retromer assembly and function
Source: eLife. 2025 Jan 7;13:RP100928. doi: 10.7554/eLife.100928 (PMC11706607; doi:10.7554/eLife.100928)
Supplement: Figure 1—source data 3. [file elife-100928-fig1-data3.xlsx]

## Sheet: Panel D
		Ctrl	LLOMe
	EXPT. 1	1	2.21831
	EXPT. 2	1	2.19033
	EXPT. 3	1	2.28349

## Sheet: Panel E
		Ctrl	LLOMe
	EXPT. 1	1	2.54251
	EXPT. 2	1	3.15349
	EXPT. 3	1	3.06446
