# Supplementary material for: Noncanonical roles of ATG5 and membrane atg8ylation in retromer assembly and function
Source: eLife. 2025 Jan 7;13:RP100928. doi: 10.7554/eLife.100928 (PMC11706607; doi:10.7554/eLife.100928)
Supplement: Figure 2—figure supplement 1—source data 1. [file elife-100928-fig2-figsupp1-data1.xlsx]

## Sheet: Panel A
		HCM LAMP2 puncta/cell
		Averages	Plate 1	Plate 2	Plate 3	Plate 1	Plate 2	Plate 3
		HeLaWT	48.1	44.43	51.27	33.45	33.18	35.83
		VPS35KO	47.5	43.63	53.59	45.26	43.49	42.24
				Ctrl			LLOMe

## Sheet: Panel C
	HCM Ubiquitin-LAMP1 Overlap
	(% of LAMP1)
		Averages	WT	ATG5KO	VPS35KO
		Plate 1	12.01	24.82	31.54
		Plate 2	13.59	25.07	33.74
		Plate 3	11	18.38	32.79
				LLOMe: 1 mM, 2 h

## Sheet: Panel E
	HCM ALIX-LAMP1 overalp
	(% of LAMP1 puncta)
		Averages	Plate 1	Plate 2	Plate 3	Plate 1	Plate 2	Plate 3
		Ctrl	23.95	18.47	19.94	22.71	17.04	20
		LLOMe	38.37	40.33	39.61	45.43	44.31	47.09
				WT			VPS35KO
