# Supplementary material for: Noncanonical roles of ATG5 and membrane atg8ylation in retromer assembly and function
Source: eLife. 2025 Jan 7;13:RP100928. doi: 10.7554/eLife.100928 (PMC11706607; doi:10.7554/eLife.100928)
Supplement: Figure 2—source data 1. [file elife-100928-fig2-data1.xlsx]

## Sheet: Panel B
	Averages	HeLa-WT			ATG5-KO			VPS35-KO
	Ctrl	0.446667	0.563338	0.527522	2.95667	1.07879	1.58125	3.885	1.02509	1.06369
	LLOME	10.7133	8.1301	10.1284	15.6033	22.6786	21.3251	15.5833	15.7124	14.5623

## Sheet: Panel D
	Averages	HeLa-WT	VPS35-KO +GFP	VPS35
	Plate 1	14.69	26.8	23.25
	Plate 2	14.62	25.82	18.51
	Plate 3	15.08	26.03	20.47

## Sheet: Panel F
	Averages	HeLaWT	ATG5KO	VPS35KO
	Plate 1	21.72	49.01	42.59
	Plate 2	20.62	41.18	40.87
	Plate 3	24.54	42.29	41.99
	Plate 4	26.93	47.59	40.99

## Sheet: Panel H
	Averages
	Plate 1
	Plate 2
	Plate 3
