# Supplementary material for: Noncanonical roles of ATG5 and membrane atg8ylation in retromer assembly and function
Source: eLife. 2025 Jan 7;13:RP100928. doi: 10.7554/eLife.100928 (PMC11706607; doi:10.7554/eLife.100928)
Supplement: Figure 3—figure supplement 1—source data 1. [file elife-100928-fig3-figsupp1-data1.xlsx]

## Sheet: Panel E
GLUT1 Puncta
Plate 1														Averages	Huh7-WT	ATG5-KO	VPS35-KO
HeLa-WT	29.36	26.44	21.93	23.34	25.69	25.97	26.36	26.21	25.66	24.63	27.18	22.65		Plate 1	25.4517	39.5375	38.5075
ATG5-KO	41.92	39.99	38.62	36.81	38.01	39.84	38.69	38.9	40.31	39.84	39.75	41.77		Plate 2	27.9108	38.8483	35.4225
VPS35-KO	43.49	40.24	42.31	32.55	32.3	43.05	38.23	36.49	36.37	36.67	38.62	41.77		Plate 3	30.1183	41.3967	44.7717
Plate 2														Plate 4	25.3717	43.875	42.89
HeLa-WT	31.03	29.6	26.24	25.49	24.45	27.85	32.57	30.47	28.5	27.49	27.81	23.43		Plate 5	27.5	42.421	41.051
ATG5-KO	41.9	35.2	40.86	36.85	38.38	39.78	42.46	40.59	36.95	39.66	37.18	36.37
VPS35-KO	37.31	36.4	37.41	33.96	32.48	37.44	36.76	33.66	34.72	36.38	36.64	31.91
Plate 3
HeLa-WT	31.14	32.03	29.55	28	31.22	28.77
ATG5-KO	45.62	38.28	43.06	39.25	42.78	39.39
VPS35-KO	50.41	46.32	42.4	41.65	43.52	44.33
Plate 4
HeLa-WT	21.13	27.49	25.78	25.32	26.01	26.5
ATG5-KO	40.29	40.83	45.08	44.61	44.73	47.71
VPS35-KO	40.85	42.66	46.19	38.14	43.9	45.6
Plate 5
HeLa-WT	24.12	28.85	30.76	27.96	29.48	25.09	25.9	29.34	27.33	26.17
ATG5-KO	44.5	39.22	41.94	42.48	42.63	43.62	40.61	41.97	42.46	44.78
VPS35-KO	44.1	41.31	37.36	35.88	40.52	43.44	41.11	44	43.15	39.64

## Sheet: Panel G
GLUT1-LAMP2 Overlap (%LAMP2)
Plate 1														Averages	Huh7-WT	ATG5-KO	VPS35-KO
HeLa-WT	12.03	10.64	9.87	10.39	11.92	12.21	11.47	11.29	10.06	9.95	9.71	9.63		Plate 1	10.7642	23.1933	22.7092
ATG5-KO	26.64	24.1	22.22	23.01	20.27	24.18	21.13	21.9	24.3	22.84	23.43	24.3		Plate 2	9.79833	23.5175	18.3758
VPS35-KO	27.9	24.9	24.06	20.39	22.67	25.44	21.93	19.18	19.18	19.63	22.1	25.13		Plate 3	11.6283	23.0633	22.5683
Plate 2														Plate 4	10.0367	22.3933	21.4567
HeLa-WT	11.12	10.67	11.48	9.5	8.57	9.4	10.33	9.71	9.8	9.28	8.99	8.73		Plate 5	11.117	22.238	20.537
ATG5-KO	24.11	21.34	23.31	23.48	23.71	23.86	26.13	26.26	23.41	23.84	21.29	21.47
VPS35-KO	22.68	19.76	19.61	19.47	18.45	19.38	18.05	16.95	16.78	16.33	18.87	14.18
Plate 3
HeLa-WT	9.95	12.9	12.01	11.65	10.51	12.75
ATG5-KO	27.8	20.43	23.58	21.28	23.3	21.99
VPS35-KO	27.66	23.8	20.11	20.65	21.67	21.52
Plate 4
HeLa-WT	8.75	9.87	10.55	8.85	10.73	11.47
ATG5-KO	21.72	19.42	22.93	22.29	23.22	24.78
VPS35-KO	20.74	19.94	23.26	18.17	22.48	24.15
Plate 5
HeLa-WT	9.11	12.62	12.58	11.13	11.7	12.79	10.54	10.17	10.72	9.81
ATG5-KO	26.04	21.37	23.16	23.82	23.53	22.03	19.84	21.41	19.7	21.48
VPS35-KO	27.39	20.24	19.81	17.89	20.14	21.28	18.82	21.78	20.25	17.77

## Sheet: Panel J
GLUT1-SNX27 Overlap (%SNX27)
Plate 1
HeLa-WT	11.51	10.97	12.79	12.67	9.66	11.5	13.36	12.31	11.8462		Averages	Huh7-WT	ATG5-KO	VPS35-KO
ATG5-KO	38.16	32.92	34.77	40.16	32.17	29.31	37.42	33.94	34.8563		Plate 1	11.8462	34.8563	28.2838
VPS35-KO	29.27	26.18	29.2	31.3	26.55	24.9	26.43	32.44	28.2838		Plate 2	10.365	34.89	30.0525
Plate 2											Plate 3	12.5517	33.6475	29.4683
HeLa-WT	12.86	11.52	11.86	11.09	9.41	8.62	8.28	9.28	10.365		Plate 4	10.1192	36.0967	27.6308
ATG5-KO	38.83	34.39	34.44	34.76	33.15	41.86	31.74	29.95	34.89		Plate 5	13.02	29.901	26.129
VPS35-KO	34.23	25.94	27.9	30.71	29.86	29.7	36.94	25.14	30.0525
Plate 3
HeLa-WT	6.81	15.5	15.43	13.77	14.78	15.16	13.61	13.46	13.13	11.55	10.07	7.35
ATG5-KO	35.6	32.49	36.52	33.51	34.7	26.26	34.52	33.16	35.11	37.14	35.35	29.41
VPS35-KO	32.01	25.93	30.01	30.92	32.53	32.55	29.17	29.92	26.29	29.97	28.52	25.8
Plate 4
HeLa-WT	11.69	9.29	10.2	12.95	11.28	6.34	8.21	9.04	10.85	12.18	10.24	9.16
ATG5-KO	36.89	30.62	34.68	37.12	34.89	35.46	36.02	38.07	34.94	40.51	38.92	35.04
VPS35-KO	26.67	24.22	26.29	28.2	25.92	28.29	26.58	28.64	30.75	28.73	28.55	28.73
Plate 5
HeLa-WT	12.12	12.81	12.74	13.66	13.94	13.3	16.07	12.05	11.43	12.08
ATG5-KO	25.86	24.23	25.89	24.9	28.9	32.31	33.2	35.56	34.37	33.79
VPS35-KO	16.63	27.27	20.76	30.39	24.33	31.45	31.05	24.97	30.68	23.76
