# Supplementary material for: Noncanonical roles of ATG5 and membrane atg8ylation in retromer assembly and function
Source: eLife. 2025 Jan 7;13:RP100928. doi: 10.7554/eLife.100928 (PMC11706607; doi:10.7554/eLife.100928)
Supplement: Figure 3—source data 3. [file elife-100928-fig3-data3.xlsx]

## Sheet: Panel D
GLUT1 Puncta
Plate 1
Huh7-WT	6.79	5.43	5.03	5.61	5.46	3.9	4.92	6.04	5.3975		Averages	Huh7-WT	ATG5-KO	VPS35-KO
ATG5-KO	15.37	16.46	16.27	12.74	13.98	15.44	13.64	15.26	14.895		Plate 1	5.3975	14.895	16.2925
VPS35-KO	17.45	18.14	16.77	12.08	15.73	13.78	17.86	18.53	16.2925		Plate 2	6.25875	18.6037	18.04
Plate 2											Plate 3	5.69375	19.37	18.3562
Huh7-WT	5.04	6.56	6.64	5.91	6.45	6.26	6.47	6.74	6.25875		Plate 4	5.41375	19.03	17.4275
ATG5-KO	15.61	13.36	21.26	22.96	17.5	22.54	17.37	18.23	18.6037		Plate 5	5.65875	16.0037	19.4538
VPS35-KO	14.77	17.26	18.39	17.04	18.01	21.69	18.33	18.83	18.04		Plate 6	5.66875	17.1612	18.3925
Plate 3
Huh7-WT	5.46	5.47	3.94	6.8	4.71	7	6.06	6.11	5.69375
ATG5-KO	18.23	18.85	18.92	18.64	22.41	18.93	20.2	18.78	19.37
VPS35-KO	17.1	17.83	16.2	19.71	19.28	17.93	19.07	19.73	18.3562
Plate 4
Huh7-WT	5.89	4.45	5.68	5.69	5.48	4.72	6.07	5.33	5.41375
ATG5-KO	16.1	18.78	18.28	21.02	17.54	20.43	20.25	19.84	19.03
VPS35-KO	19.7	16.15	16.01	16.62	15.54	15.48	17.59	22.33	17.4275
Plate 5
Huh7-WT	6.13	5.45	4.8	5.86	5.96	5.44	4.8	6.83	5.65875
ATG5-KO	15.81	18.44	17.69	12.82	14.29	16.52	16.39	16.07	16.0037
VPS35-KO	23.02	19.48	17.53	19.21	19.96	17.66	18.59	20.18	19.4538
Plate 6
Huh7-WT	5.25	5.57	6.24	6.45	4.77	4.96	5.64	6.47	5.66875
ATG5-KO	14.48	18.32	19.82	21.13	12.75	18.99	16.41	15.39	17.1612
VPS35-KO	18.98	17.85	17.57	12.3	20.3	21.58	18.2	20.36	18.3925

## Sheet: Panel E
GLUT1-LAMP2 Overlap (%LAMP2)
Plate 1
Huh7-WT	3.31	3.31	3.16	2.91	3.49	2.23	2.64	2.94	2.99875		Averages	Huh7-WT	ATG5-KO	VPS35-KO
ATG5-KO	27.82	29.72	31.41	27.88	27.76	28.88	28.53	29.23	28.9037		Plate 1	2.99875	28.9037	31.8387
VPS35-KO	31.73	32.75	32.84	27.88	32.8	30.07	32.03	34.61	31.8387		Plate 2	3.46875	32.0312	33.1725
Plate 2											Plate 3	3.26625	33.1025	32.845
Huh7-WT	2.93	3.76	3.4	3.63	3.62	3.48	3.4	3.53	3.46875		Plate 4	3.1625	32.105	30.5613
ATG5-KO	30.13	28.91	32.88	33.51	31.57	34.23	31.6	33.42	32.0312		Plate 5	3.255	28.4575	33.2237
VPS35-KO	30.8	31.03	34.83	34.2	31.93	35.65	32.72	34.22	33.1725		Plate 6	3.20625	29.3137	32.51
Plate 3
Huh7-WT	3.33	2.88	3.08	3.49	3.07	3.73	3.03	3.52	3.26625
ATG5-KO	33.29	32.86	32.43	30.29	35.32	33.53	32.74	34.36	33.1025
VPS35-KO	33.3	33.48	29.74	33.79	32.69	31.35	34.7	33.71	32.845
Plate 4
Huh7-WT	3.1	2.69	3.33	3.49	3.53	2.43	3.64	3.09	3.1625
ATG5-KO	29.64	31.75	30.83	32.82	32.73	32.39	32.12	34.56	32.105
VPS35-KO	33.15	28.63	32.16	28.09	26.95	28.46	32.86	34.19	30.5613
Plate 5
Huh7-WT	3.38	3.13	3.05	3.21	3.84	2.93	2.77	3.73	3.255
ATG5-KO	26.8	30.76	31	29.03	26.13	28.03	27.39	28.52	28.4575
VPS35-KO	35.01	32.97	31.89	32.27	34.23	32.28	32.85	34.29	33.2237
Plate 6
Huh7-WT	3.22	3.05	3.46	3.28	2.81	2.95	3.71	3.17	3.20625
ATG5-KO	27.86	28.46	30.6	31.62	27.89	31.76	27.97	28.35	29.3137
VPS35-KO	30.52	32.8	33.65	28.98	34.73	32.54	33.94	32.92	32.51

## Sheet: Panel G
GLUT1-SNX27 Overlap (%SNX27)
Plate 1
Huh7-WT	5.81	5.77	5.27	5.18	5.97	6.12	4.91	6	6.47	5.87	5.737		Averages	Huh7-WT	ATG5-KO	VPS35-KO
ATG5-KO	36.53	35.67	38.69	36.4	37.61	34.55	39.38	36.5	39.47	37.74	37.254		Plate 1	5.737	37.254	38.251
VPS35-KO	35.78	38.93	34.25	35.96	37.75	37.61	40.48	39.05	39.85	42.85	38.251		Plate 2	5.392	36.77	37.889
Plate 2													Plate 3	5.331	36.851	40.453
Huh7-WT	5.15	6.36	5.75	5.09	5.16	5.92	4.79	5.77	5.52	4.41	5.392		Plate 4	7.389	40.728	40.715
ATG5-KO	37.63	35.92	37.65	34.56	38.04	35.46	35.3	37.3	37.76	38.08	36.77		Plate 5	7.024	41.04	40.179
VPS35-KO	35.67	36.53	37.17	36.17	37.69	38.28	40.9	36.18	40.1	40.2	37.889
Plate 3
Huh7-WT	4.84	5.13	5.13	5.42	5.22	4.77	5.2	5.76	6.15	5.69	5.331
ATG5-KO	32.79	38.38	37.88	37.5	33.21	37.12	38.51	33.56	39.92	39.64	36.851
VPS35-KO	41.03	40.44	38.87	39.37	39.92	39.98	40.66	37.63	44.94	41.69	40.453
Plate 4
Huh7-WT	7.31	8.55	7.86	7.25	7.88	7.18	7.24	7.09	6.57	6.96	7.389
ATG5-KO	38.25	40.76	40.66	41.91	38.25	41.66	40.97	41.03	42.74	41.05	40.728
VPS35-KO	40.16	35.06	42.04	39.57	42.14	42.86	41.28	41.99	40.56	41.49	40.715
Plate 5
Huh7-WT	7.04	6.64	7.09	6.54	6.99	6.97	7.56	6.73	6.19	8.49	7.024
ATG5-KO	40.38	40.34	41.55	40.96	39.47	40.8	42.27	40.33	40.23	44.07	41.04
VPS35-KO	41.35	38.82	39.72	36.55	41.44	39.69	39.39	40.82	41.7	42.31	40.179

## Sheet: Panel I
				Huh7WT	ATG5KO	VPS35KO					Huh7WT	ATG5KO	VPS35KO
			EXPT. 1	0.368162	1.19077	1.38344				EXPT. 1	0.243378	1.67644	1.69892
			EXPT. 2	0.436105	1.43635	1.27683				EXPT. 2	0.292912	1.70867	1.85209
			EXPT. 3	0.421841	1.57323	1.46693				EXPT. 3	0.278151	1.14142	1.39651
			Fold change of GLUT1 in LysoIPs (Normalized to LAMP2)							Fold change of SNX27 in LysoIPs (Normalized to LAMP2)
