# Supplementary material for: Noncanonical roles of ATG5 and membrane atg8ylation in retromer assembly and function
Source: eLife. 2025 Jan 7;13:RP100928. doi: 10.7554/eLife.100928 (PMC11706607; doi:10.7554/eLife.100928)
Supplement: Figure 4—figure supplement 1—source data 3. [file elife-100928-fig4-figsupp1-data3.xlsx]

## Sheet: Panel B
	(i)	WT	ATG3KO	ATG5KO	ATG7KO		(ii)	WT	ATG3KO	ATG5KO	ATG7KO		(iii)	WT	ATG3KO	ATG5KO	ATG7KO
	EXPT. 1	1.00019	0.96858	1.02192	0.959099		EXPT. 1	1	0.981844	1.01994	0.964406		EXPT. 1	0.999999	0.797532	0.840858	0.939878
	EXPT. 2	1	1.0687	1.00116	0.813885		EXPT. 2	1	1.06612	0.999076	0.810506		EXPT. 2	1	1.07564	1.00725	0.825278
	EXPT. 3	1	0.98664	1.05193	1.00119		EXPT. 3	1	0.980308	1.02874	0.985899		EXPT. 3	1	0.979151	1.04804	1.00202
		Relative levels of VPS35 (% of actin)					Relative levels of VPS26 (% of actin)						Relative levels of VPS29 (% of actin)

## Sheet: Panel D
		(i)	WT	ATG5KO			(ii)	WT	ATG5KO			(iii)	WT	ATG5KO
		EXPT. 1	1.14903	1.18396			EXPT. 1	1.1034	1.05721			EXPT. 1	1.0924	1.084
		EXPT. 2	1.17989	1.05212			EXPT. 2	1.06167	1.01652			EXPT. 2	1.14382	1.22388
		EXPT. 3	1.26016	1.2176			EXPT. 3	1.07925	1.0673			EXPT. 3	1.11405	1.19769
		Relative levels of VPS35 (% of actin)					Relative levels of VPS26 (% of actin)					Relative levels of VPS29 (% of actin)

## Sheet: Panel E
GLUT1-LAMP2 Overlap (%LAMP2)
Plate 1
LC3-TKO	36.2	37.39	33.46	34.13	35.18	36.22	35.26	34.35	35.2737		Averages	LC3-TKO	GABA-TKO	Hexa-KO
GABA-TKO	34.68	36.12	36.62	34.7	35.16	34.57	34.42	34.89	35.145		Plate 1	35.2737	35.145	30.44
Hexa-KO	30.33	30.29	31.03	30.29	30.45	31.48	29.31	30.34	30.44		Plate 2	35.185	36.0075	30.6063
Plate 2											Plate 3	35.4163	35.0787	28.1412
LC3-TKO	37.37	37.06	35.46	34.19	31.83	36.06	35.75	33.76	35.185		Plate 4	34.5825	36.705	28.7325
GABA-TKO	37.46	38.01	37.05	35.11	35.26	35.8	35.9	33.47	36.0075
Hexa-KO	29.48	30.44	31.51	31.58	31.34	29.42	32.31	28.77	30.6062
Plate 3
LC3-TKO	34.9	35.31	34.87	35.64	36.52	36.51	34.59	34.99	35.4163
GABA-TKO	34.41	35.55	36.79	35.57	33.12	33.97	36.17	35.05	35.0787
Hexa-KO	26.64	27.4	26.94	28.43	28.52	29.33	28.09	29.78	28.1412
Plate 4
LC3-TKO	34.97	35.26	34.37	34.96	33.59	36.92	33.26	33.33	34.5825
GABA-TKO	34.49	36.61	37.17	37.42	36.14	37.36	38.68	35.77	36.705
Hexa-KO	28.72	29.21	28.06	29.97	28.01	28.24	28.89	28.76	28.7325
