# Supplementary material for: Noncanonical roles of ATG5 and membrane atg8ylation in retromer assembly and function
Source: eLife. 2025 Jan 7;13:RP100928. doi: 10.7554/eLife.100928 (PMC11706607; doi:10.7554/eLife.100928)
Supplement: Figure 4—source data 1. [file elife-100928-fig4-data1.xlsx]

## Sheet: Panel B
Glut1 Puncta
Plate 1											Values used for normalization						Plate 9									Values used for normalization
Huh7-WT	16.99	16.02	15.65	13.97	15.61	17.82	14.84	17.71			Plate 1-8 Averages	Huh7-WT	ATG16L1-KO	ATG5-KO	VPS35-KO		Huh7-WT	16.2	13.91	11.48	9.12	6.8	5.67			Plate 9-12 Averages	Huh7-WT	ATG3-KO	ATG5-KO	ATG7-KO
ATG5-KO	41.82	36.66	35.8	35.78	39.39	38.9	38.96	38.3			Plate 1	17.9088	36.6063	41.8	38.2013		ATG3-KO	23.2	15.59	14.84	17.1	17.97	17.05			Plate 1	10.53	17.625	32.4933	21.8417
ATG16L1-KO	38.19	33.04	36.54	36.37	39.06	38.34	36.02	35.29			Plate 2	16.5312	35.0537	39.9887	36.6037		ATG5-KO	31.6	30.58	34.04	40.16	32.26	26.32			Plate 2	12.0217	18.7817	31.1833	23.7117
VPS35-KO	41.8	41.63	42.28	43.45	43.84	40.45	40.72	40.23			Plate 3	16.6088	34.905	39.2025	38.7413		ATG7-KO	22.17	22.7	23.67	20.65	20.3	21.56			Plate 3	12.025	19.055	30.8167	20.235
Plate 2											Plate 4	20.9187	32.4725	41.85	36.9325		VPS35-KO	37.51	35.81	37.93	36.29	37.99	37.07			Plate 4	8.86167	14.695	28.255	16.8917
Huh7-WT	14.16	14.16	14.57	12.91	14.58	12.93	12.08	13.04			Plate 5	21.5563	31.4187	38.9	41.1238		Plate 10
ATG5-KO	38.94	34.86	35.02	36.6	34.78	37.72	36.2	38.71			Plate 6	22.2713	35.2175	44.3137	41.3362		Huh7-WT	9.53	11.44	12.57	11.42	12.01	15.16
ATG16L1-KO	33.75	33.44	35.98	39.17	33.77	37.4	34.14	32.78			Plate 7	14.2475	28.4162	32.825	32.4138		ATG3-KO	15.55	19.56	15.87	18.58	22.62	20.51
VPS35-KO	42.99	43.81	42.11	38.22	41.5	39.5	37	34.78			Plate 8	18.8462	28.8625	35.3837	37.7125		ATG5-KO	26.14	28.24	33.99	37.83	24.83	36.07
Plate 3																	ATG7-KO	23.03	24.17	25.89	24.82	20.78	23.58
Huh7-WT	17.71	17.54	19.41	17.86	18.39	18.04	16.81	15.86									VPS35-KO	38.9	40.45	39.3	35.16	36.43	42.47
ATG5-KO	42.31	40.09	40.74	41	41.78	39.51	39.08	25.42									Plate 11
ATG16L1-KO	33.24	32.6	36.45	39.13	35.25	36.16	34.19	32.22									Huh7-WT	13.18	11.69	13.23	13.72	8.83	11.5
VPS35-KO	41.29	41.2	40.29	38.87	39.98	38.8	37.44	35.75									ATG3-KO	22.66	20.74	18.91	15.93	17.92	18.17
Plate 4																	ATG5-KO	36.86	36.53	23.53	28.39	30.26	29.33
Huh7-WT	17.55	15.28	16.08	13.59	13.77	17.06	14.89	17.91									ATG7-KO	25.25	20.16	20.71	19.44	16.23	19.62
ATG5-KO	39.32	33.95	32.41	33.32	41.5	37.08	40.5	37.38									VPS35-KO	37.04	28.27	23.95	36.94	33.32	32.83
ATG16L1-KO	30.06	31.9	33.72	32.74	36.85	34.12	28.91	31.48									Plate 12
VPS35-KO	41.73	42.77	44.6	42.28	42.89	41.77	40.58	38.18									Huh7-WT	6.96	8.2	9	10.12	9.18	9.71
Plate 5																	ATG3-KO	13.12	14.7	15.99	17.56	13.81	12.99
Huh7-WT	19.65	18.64	17.13	15.92	17.35	16.43	17.47	16.2									ATG5-KO	21.22	24.1	32.71	26.08	31.4	34.02
ATG5-KO	40.21	44.69	40.13	41.94	42.39	41.72	38.31	39.6									ATG7-KO	16.54	15.94	16.56	20.04	16.27	16
ATG16L1-KO	30.67	29.28	31.92	34.35	36.59	31.95	27.38	29.21									VPS35-KO	34.33	34.49	26.88	27.03	29.64	27.74
VPS35-KO	42.32	40.66	40.9	40.74	30.08	39.5	38.64	38.36									Plate 13
Plate 6																	Huh7-WT	4.55	5.86	4.69	5.26	3.61	4.18	3.63	5.38	3.86	5.17	5.14	5.74
Huh7-WT	19.1	21.27	21.72	18.85	16.68	15.3	17.98	17.41									ATG3-KO	14.68	12.84	9.45	8.49	9.2	5.83	8.73	10.76	10.49	11.22	12.22	12.12
ATG5-KO	40.6	42.24	42.63	42.38	42.49	40.09	40.21	40.05									ATG5-KO	16.26	21.05	16.04	19.73	19.13	11.59	14.25	14.44	18.87	22.23	18.48	13.37
ATG16L1-KO	35.34	33.64	36.33	38.61	36.7	34.97	34.92	31.23									ATG7-KO	14.54	10.91	13.49	13.71	10.94	7.35	7.31	12.38	11.51	12.53	11.56	11.24
VPS35-KO	42.12	43.77	43.43	48.91	48.01	44.24	42.36	41.67									VPS35-KO	22.06	26.38	21.78	18.55	27.66	32.7	19.16	15.69	21.3	15.61	19.96	20.79
Plate 7
Huh7-WT	13.81	12.67	13.87	13.12	13.34	16.6	12.99	14.79
ATG5-KO	36.05	29.22	29.68	31.54	35.94	32.12	33.28	31.48
ATG16L1-KO	28.71	24.52	28.79	29.27	32.61	30.38	27.07	25.98
VPS35-KO	31.24	32.78	32.1	34.84	36.67	31.72	31.1	32.15
Plate 8
Huh7-WT	17.96	17.34	16.6	15.2	16.23	16.23	16.98	16
ATG5-KO	35.87	40.88	37.04	39.1	39.31	37.63	34.6	37.27
ATG16L1-KO	27.83	26.98	30.55	30.98	33.03	29.39	26.21	25.93
VPS35-KO	39.83	35.96	36.04	37.96	26.44	36.49	36.25	34.1
Normalization: GLUT1 puncta per cell
			ORIGINAL AVERAGED DATA								NORMALIZED DATA
		Huh7WT	ATG16L1KO	ATG5KO	VPS35KO					Huh7WT	ATG16L1KO	ATG5KO	VPS35KO
	Plate 1	17.9088	36.6063	41.8	38.2013				Plate 1	1	2.04404	2.33405	2.13311
	Plate 2	16.5312	35.0538	39.9888	36.6037				Plate 2	1	2.12045	2.41898	2.21422
	Plate 3	16.6088	34.905	39.2025	38.7413				Plate 3	1	2.1016	2.36035	2.33258
	Plate 4	20.9187	32.4725	41.85	36.9325				Plate 4	1	1.55232	2.0006	1.76552
	Plate 5	21.5562	31.4187	38.9	41.1238				Plate 5	1	1.45752	1.80458	1.90774
	Plate 6	22.2712	35.2175	44.3137	41.3362				Plate 6	1	1.5813	1.98973	1.85604
	Plate 7	14.2475	28.4163	32.825	32.4138				Plate 7	1	1.99447	2.30391	2.27505
	Plate 8	18.8463	28.8625	35.3837	37.7125				Plate 8	1	1.53147	1.8775	2.00106
		Huh7WT	ATG3KO	ATG5KO	ATG7KO	VPS35KO				Huh7WT	ATG3KO	ATG5KO	ATG7KO	VPS35KO
	Plate 9	10.53	17.625	32.4933	21.8417	37.1			Plate 9	1	1.67379	3.08579	2.07423	3.52327
	Plate 10	12.0217	18.7817	31.1833	23.7117	38.785			Plate 10	1	1.56232	2.59393	1.97241	3.22626
	Plate 11	12.025	19.055	30.8167	20.235	32.0583			Plate 11	1	1.58462	2.56272	1.68274	2.66597
	Plate 12	8.86167	14.695	28.255	16.8917	30.0183			Plate 12	1	1.65827	3.18845	1.90615	3.38744
	Plate 13	4.75583	10.5025	17.12	11.4558	21.8033			Plate 13	1	2.20834	3.59979	2.4088	4.58454

## Sheet: Panel D
GLUT1-LAMP2 Overlap (%LAMP2)
Plate 1																Plate 9
Huh7-WT	13.98	13.28	14.32	14.66	13.67	15	14.52	14.4								Huh7-WT	11.09	10.58	9.53	8.76	7.56	7.06		Averages	Huh7-WT	ATG3-KO	ATG5-KO	ATG7-KO	VPS35-KO
ATG16L1-KO	18.92	18.37	20.42	17.43	18.74	19.48	19.33	18.66								ATG3-KO	13.33	15.04	13.88	14.07	15.25	14.77		Plate 1	9.09667	14.39	29.3433	15.3	27.9033
ATG5-KO	27.82	29.94	29.91	29.35	30.69	28.69	30.02	29.5								ATG5-KO	30.65	26.09	25.98	26.78	30.39	36.17		Plate 2	9.87	13.94	32.4	16.0417	29.2633
VPS35-KO	28.39	30.29	32	33.83	29.73	31.84	30.34	30.07								ATG7-KO	15.21	15.12	14.53	14.98	15.6	16.36		Plate 3	11.7017	14.95	32.8383	16.4833	32.5717
Plate 2																VPS35-KO	27.19	29.36	26.5	25.46	29.36	29.55		Plate 4	11.175	14.8233	31.8367	16.3583	31.435
Huh7-WT	14.47	14.57	13.77	14.03	14.38	15.23	13.59	13.84								Plate 10								Plate 5	9.97	14.07	31.9	15.67	29.71
ATG16L1-KO	17.15	19.19	18.51	17.93	18.8	18.57	18.3	17.83								Huh7-WT	8.66	10.26	9.26	9.83	9.73	11.48
ATG5-KO	28.67	29.85	30.51	28.67	30.61	29.9	30.82	30.29								ATG3-KO	13.31	13.68	14.02	14.36	14.75	13.52
VPS35-KO	28.56	30.09	31.21	28.59	30.31	32.65	31.08	29.37								ATG5-KO	38.02	34.73	33.03	28.84	26.99	32.79
Plate 3																ATG7-KO	16.97	16.05	15.63	15.63	15.84	16.13
Huh7-WT	14.21	14.5	14.33	14.33	14.41	14.22	13.37	13.71								VPS35-KO	28.86	27.77	26.11	33.81	29.27	29.76
ATG16L1-KO	16.62	18.26	17.51	19.85	18.01	18.89	18.98	17.84								Plate11
ATG5-KO	25.97	28.22	29.13	30.01	29.97	28.45	30.04	29.38								Huh7-WT	12.5	11.99	12.03	12.51	10.11	11.07
VPS35-KO	29.16	30.61	31.78	30.69	30.9	29.96	30.92	34.31								ATG3-KO	15.08	15.1	15.67	13.65	14.53	15.67
Plate 4																ATG5-KO	29.84	32.91	34.54	29.51	33.56	36.67
Huh7-WT	14.36	13.28	14.79	14.92	14.21	14.72	14.12	14.1								ATG7-KO	15.57	17.06	16.03	17.06	16.67	16.51
ATG16L1-KO	19.07	21.93	19.6	20.05	16.58	19.73	20.36	20.14								VPS35-KO	28.15	32.13	32.92	33.49	34.66	34.08
ATG5-KO	29.64	30.12	31.82	30.91	28.03	30.27	31.78	30.72								Plate 12
VPS35-KO	30.53	33.5	34.87	34.08	31.18	30.73	29.85	31.29								Huh7-WT	10.06	10.85	10.76	11.56	11.5	12.32
Plate 5																ATG3-KO	14.55	14.95	14.94	15.25	15	14.25
Huh7-WT	13.94	15.14	15.44	15.41	14.96	15.34	14.65	14.38								ATG5-KO	37.65	32.47	28.67	32.48	30.06	29.69
ATG16L1-KO	19.09	19.52	20.64	19.53	20.4	21.32	21.3	20.63								ATG7-KO	16.28	15.98	16.72	16.34	17.21	15.62
ATG5-KO	25.94	28.28	27.86	28.15	36.58	31.53	28.97	28.72								VPS35-KO	24.82	27.35	31.5	34.61	33.72	36.61
VPS35-KO	27.69	28.1	32.54	29.86	28.02	30.43	30.3	28.98								Plate 13
Plate 6																Huh7-WT	9.01	10.5	9.49	11.02	9.39	9.6	8.63	10.46	10.05	11.14	9.56	10.84
Huh7-WT	14.21	15.88	15.12	15	15.22	15.1	14.63	13.76								ATG3-KO	13.94	13.15	13.84	13.04	13.96	13.67	15.16	14.35	15.05	14.28	13.84	14.56
ATG16L1-KO	16.58	19.19	17.49	17.87	17.88	18.08	20.67	18.26								ATG5-KO	28.97	28.23	29.03	28.52	31.7	37.05	35.07	34.8	30.73	29.11	35.97	33.59
ATG5-KO	26.17	29.1	27.88	27	31.21	30.55	28.59	31.87								ATG7-KO	15.34	15.27	15.03	15.96	15.42	16.76	17.59	14.99	14.98	15.97	15.9	14.84
VPS35-KO	28.1	30.84	30.75	29.26	28.18	31.93	29.91	28.77								VPS35-KO	27.87	26.5	28.63	27.42	26.83	26.99	33.18	34.22	30.98	29.2	30.34	34.35
Plate 7
Huh7-WT	12.81	11.85	13.09	14.21	12.56	14.84	13.19	12.64
ATG16L1-KO	17.64	17.35	17.44	15.07	15.46	17.64	18.12	17.5
ATG5-KO	24.64	26.09	26.11	25.95	26.31	25.41	25.77	25.92
VPS35-KO	22.98	27.26	28.73	27.01	24.39	28.25	25.88	26.63
Plate 8
Huh7-WT	20.19	20.18	21.22	21.22	20.62	20.66	20.11	19.72
ATG16L1-KO	47.73	48	48.19	45.49	49.13	48.37	47.07	46.84
ATG5-KO	62.49	64.01	64.47	63.36	70.15	67.15	65.35	65.36
VPS35-KO	61.27	62.02	65.46	65.22	64.7	64.18	64.35	64.95
Normalization GLUT1-LAMP2 %Overlap
			ORIGINAL DATA								Normalized DATA
		Huh7WT	ATG16L1KO	ATG5KO	VPS35KO					Huh7WT	ATG16L1KO	ATG5KO	VPS35KO
	Plate 1	14.2287	18.9187	29.49	30.8113					1	1.32961	2.07256	2.16542
	Plate 2	14.235	18.285	29.915	30.2325					1	1.28451	2.10151	2.12381
	Plate 3	14.135	18.245	28.8962	31.0412					1	1.29077	2.0443	2.19606
	Plate 4	14.3125	19.6825	30.4113	32.0038					1	1.3752	2.1248	2.23607
	Plate 5	14.9075	20.3038	29.5038	29.49					1	1.36198	1.97912	1.9782
	Plate 6	14.865	18.2525	29.0463	29.7175					1	1.22788	1.954	1.99916
	Plate 7	13.1487	17.0275	25.775	26.3912					1	1.29499	1.96026	2.00713
	Plate 8	20.49	47.6025	65.2925	64.0187					1	2.32321	3.18655	3.12439
		Huh7WT	ATG3KO	ATG5KO	ATG7KO	VPS35KO				Huh7WT	ATG3KO	ATG5KO	ATG7KO	VPS35KO
	Plate 9	9.09667	14.39	29.3433	15.3	27.9033				1	1.5819	3.22572	1.68193	3.06742
	Plate 10	9.87	13.94	32.4	16.0417	29.2633				1	1.41236	3.28267	1.6253	2.96488
	Plate 11	11.7017	14.95	32.8383	16.4833	32.5717				1	1.2776	2.80629	1.40863	2.78351
	Plate 12	11.175	14.8233	31.8367	16.3583	31.435				1	1.32647	2.84892	1.46383	2.81298
	Plate 13	9.97	14.07	31.9	15.67	29.71				1	1.41123	3.1996	1.57172	2.97994

## Sheet: Panel F
GLUT1-LAMP2 Overlap (%LAMP2)
Plate 1
HeLa-WT	41.82	42.12	37.05	36.6	39.98	45.36	40.4883		Averages	HeLa-WT	Hexa-KO
Hexa-KO	53.23	62.2	60.81	62.07	61.95	61.25	60.2517		Plate 1	40.4883	60.2517
Plate 2									Plate 2	40.62	59.97
HeLa-WT	42.08	37.21	41.89	42.26	39.81	40.47	40.62		Plate 3	35.985	58.2633
Hexa-KO	59.91	60.69	63.08	60.71	60.07	55.36	59.97		Plate 4	34.685	57.4217
Plate 3
HeLa-WT	34.53	34.4	36.28	35.78	38.28	36.64	35.985
Hexa-KO	57.04	57.09	59.91	57.98	60.14	57.42	58.2633
Plate 4
HeLa-WT	35.96	33.16	32.82	38.61	38.42	29.14	34.685
Hexa-KO	59.51	59.97	59.13	54.41	55.05	56.46	57.4217
