# Supplementary material for: Noncanonical roles of ATG5 and membrane atg8ylation in retromer assembly and function
Source: eLife. 2025 Jan 7;13:RP100928. doi: 10.7554/eLife.100928 (PMC11706607; doi:10.7554/eLife.100928)
Supplement: Figure 5—source data 1. [file elife-100928-fig5-data1.xlsx]

## Sheet: Panel B
Glut1 Puncta
Plate 1
Huh7-WT	18.87	16.83	16.32	17.81	17.75	19.72	17.98	17.99		Averages	Huh7-WT	ATG13-KO	FIP200-KO	ATG5-KO	VPS35-KO
ATG13-KO	17.84	16.09	19.02	18.49	16.7	17.44	15.95	19.17		Plate 1	17.9088	17.5875	16.0763	41.8	38.2013
FIP200-KO	16.99	16.02	15.65	13.97	15.61	17.82	14.84	17.71		Plate 2	16.5312	16.0375	13.5538	39.9887	36.6037
ATG5-KO	41.8	41.63	42.28	43.45	43.84	40.45	40.72	40.23		Plate 3	16.6088	17.925	17.7025	39.2025	38.7413
VPS35-KO	41.82	36.66	35.8	35.78	39.39	38.9	38.96	38.3		Plate 4	20.9187	21.7587	15.7662	41.85	36.9325
Plate 2										Plate 5	21.5563	22.6338	17.3487	38.9	41.1238
Huh7-WT	17.83	16.7	16.61	16.41	16.57	16.81	16.02	15.3		Plate 6	22.2713	25.1325	18.5388	44.3137	41.3362
ATG13-KO	15.4	16.51	16.37	17.57	17.56	16.21	14.01	14.67		Plate 7	14.2475	15.355	13.8987	32.825	32.4138
FIP200-KO	14.16	14.16	14.57	12.91	14.58	12.93	12.08	13.04		Plate 8	18.8462	21.3537	16.5675	35.3837	37.7125
ATG5-KO	42.99	43.81	42.11	38.22	41.5	39.5	37	34.78
VPS35-KO	38.94	34.86	35.02	36.6	34.78	37.72	36.2	38.71
Plate 3
Huh7-WT	18.17	17.55	17.62	16.81	16.6	15.97	14.41	15.74
ATG13-KO	16.36	18.06	19.17	19.06	18.85	18.64	16.54	16.72
FIP200-KO	17.71	17.54	19.41	17.86	18.39	18.04	16.81	15.86
ATG5-KO	41.29	41.2	40.29	38.87	39.98	38.8	37.44	35.75
VPS35-KO	42.31	40.09	40.74	41	41.78	39.51	39.08	25.42
Plate 4
Huh7-WT	23.01	18.85	18.88	23	22.25	20.9	20.91	19.55
ATG13-KO	21.4	20.82	23.11	23.28	20.91	20.84	20.67	23.04
FIP200-KO	17.55	15.28	16.08	13.59	13.77	17.06	14.89	17.91
ATG5-KO	41.73	42.77	44.6	42.28	42.89	41.77	40.58	38.18
VPS35-KO	39.32	33.95	32.41	33.32	41.5	37.08	40.5	37.38
Plate 5
Huh7-WT	24.39	22.62	21.4	20.03	21.92	20.01	20.53	21.55
ATG13-KO	22.4	21.54	24.39	23.86	25.03	22.77	20.37	20.71
FIP200-KO	19.65	18.64	17.13	15.92	17.35	16.43	17.47	16.2
ATG5-KO	42.32	40.66	40.9	40.74	30.08	39.5	38.64	38.36
VPS35-KO	40.21	44.69	40.13	41.94	42.39	41.72	38.31	39.6
Plate 6
Huh7-WT	23.06	23.06	23.44	23.31	21.63	20.52	20.79	22.36
ATG13-KO	30.43	25.15	25.95	28.17	23.57	22.94	22.58	22.27
FIP200-KO	19.1	21.27	21.72	18.85	16.68	15.3	17.98	17.41
ATG5-KO	42.12	43.77	43.43	48.91	48.01	44.24	42.36	41.67
VPS35-KO	40.6	42.24	42.63	42.38	42.49	40.09	40.21	40.05
Plate 7
Huh7-WT	14.8	13.49	13.4	14.49	14.39	15.85	13.69	13.87
ATG13-KO	14.32	13.74	16.26	17.43	15.78	14.92	14.47	15.92
FIP200-KO	13.81	12.67	13.87	13.12	13.34	16.6	12.99	14.79
ATG5-KO	31.24	32.78	32.1	34.84	36.67	31.72	31.1	32.15
VPS35-KO	36.05	29.22	29.68	31.54	35.94	32.12	33.28	31.48
Plate 8
Huh7-WT	21.42	19.54	18.84	17.89	18.54	17.44	18.51	18.59
ATG13-KO	20.62	20.59	23.17	22.56	23.46	22.29	20.14	18
FIP200-KO	17.96	17.34	16.6	15.2	16.23	16.23	16.98	16
ATG5-KO	39.83	35.96	36.04	37.96	26.44	36.49	36.25	34.1
VPS35-KO	35.87	40.88	37.04	39.1	39.31	37.63	34.6	37.27

## Sheet: Panel D
GLUT1-LAMP2 Overlap (%LAMP2)
Plate 1
Huh7-WT	15.5	15.73	16.73	16.06	15.71	16.54	16.08	16.06		Averages	Huh7-WT	ATG13-KO	FIP200-KO	ATG5-KO	VPS35-KO
ATG13-KO	16.93	15.77	17.02	16.05	15.59	15.39	15.43	16.79		Plate 1	16.0512	16.1212	13.9	63.695	64.4887
FIP200-KO	13.51	13.75	13.53	13.9	13.77	14.68	14.03	14.03		Plate 2	16.465	16.505	13.6937	63.9125	63.4225
ATG5-KO	62.48	64.06	63.18	64.72	65.35	62.67	63.78	63.32		Plate 3	15.8712	16.29	13.785	61.4763	62.0637
VPS35-KO	62.98	63.2	64.13	66.87	64.97	66.01	64.45	63.3		Plate 4	19.645	19.6513	13.2538	64.8612	65.3725
Plate 2										Plate 5	20.6175	20.575	13.7737	63.9463	64.005
Huh7-WT	16.39	16.59	15.94	16.55	17.02	17.1	16.29	15.84		Plate 6	21.7938	19.9337	14.7413	64.48	64.4363
ATG13-KO	15.93	17.15	16.62	16.79	17.31	15.53	16.32	16.39		Plate 7	14.4825	15.1288	12.6375	59.8263	60.425
FIP200-KO	13.71	14.17	14.38	14	13.63	13.45	13.72	12.49		Plate 8	20.49	19.965	13.6462	65.2925	64.0188
ATG5-KO	63.26	64.21	65.18	62.56	63.8	64.12	64.65	63.52
VPS35-KO	63.24	61.69	64.38	62.02	61.36	66.12	64.99	63.58
Plate 3
Huh7-WT	16.36	16.21	16.31	16.1	15.73	15.61	14.77	15.88
ATG13-KO	16.44	17.33	15.92	15.32	16.34	16.11	16.6	16.26
FIP200-KO	13.6	13.89	14.68	14.42	13.75	14.22	12.59	13.13
ATG5-KO	59.09	61.88	60.55	61.79	62.69	62	61.06	62.75
VPS35-KO	59.91	61.26	63.5	62.55	64.01	61.44	62.28	61.56
Plate 4
Huh7-WT	19.63	18.28	19.83	20.37	19.91	19.95	19.32	19.87
ATG13-KO	20.21	19.78	19.89	19.24	19.99	19.24	19.09	19.77
FIP200-KO	14.26	14.36	12.98	13.03	13.2	12.78	13.15	12.27
ATG5-KO	64.58	64.02	66.36	64.87	63.3	64.74	66.47	64.55
VPS35-KO	64.62	66.68	66.66	66.35	64.46	63.69	64.74	65.78
Plate 5
Huh7-WT	20.54	20.43	21.62	21.44	20.57	20.91	19.46	19.97
ATG13-KO	21.74	20.1	21.79	20.18	21.67	18.94	19.72	20.46
FIP200-KO	13.61	14.49	14.84	14	13.97	13.06	13.81	12.41
ATG5-KO	62.16	62.74	62.89	62.68	68.93	65.16	63.92	63.09
VPS35-KO	62.05	62.65	67.02	65.22	63.58	64.76	63.48	63.28
Plate 6
Huh7-WT	21.9	22.38	22.96	22.19	22.12	21.79	20.05	20.96
ATG13-KO	21.56	19.89	20.75	19.37	19.42	18.85	19.17	20.46
FIP200-KO	14.03	15.28	16.65	16.46	12.79	13.4	14.78	14.54
ATG5-KO	61.81	64.71	62.76	62.94	66.63	67.14	64.1	65.75
VPS35-KO	62.98	65.77	66.58	64.01	63.48	65.22	63.67	63.78
Plate 7
Huh7-WT	14.22	13.83	15.44	14.81	14.53	14.98	13.87	14.18
ATG13-KO	15.79	14.58	15.95	16.09	14.79	14.12	14.51	15.2
FIP200-KO	12.07	11.88	12.28	13.3	12.61	13.98	12.6	12.38
ATG5-KO	58.7	60.63	59.07	60.76	60.9	59.03	59.29	60.23
VPS35-KO	58.5	60	61.8	61.03	59.93	62.23	60.12	59.79
Plate 8
Huh7-WT	20.19	20.18	21.22	21.22	20.62	20.66	20.11	19.72
ATG13-KO	21.26	19.38	21.1	19.65	20.61	18.67	19.5	19.55
FIP200-KO	13.37	13.91	14.66	13.78	14.07	13.54	13.46	12.38
ATG5-KO	62.49	64.01	64.47	63.36	70.15	67.15	65.35	65.36
VPS35-KO	61.27	62.02	65.46	65.22	64.7	64.18	64.35	64.95

## Sheet: Panel E
Glut1 Puncta
Plate 1
Huh7-WT	12.94	13.04	13.05	11.2	12.17			Averages	Huh7-WT	FIP200-KO	FIP200-KO +siATG5	VPS35-KO
FIP200-KO	12.71	12.64	10.44	11.27	11.17			Plate 1	12.48	11.646	21.828	25.53
FIP200-KO +siATG5	23.46	24.21	20	17.45	24.02			Plate 2	11.878	10.504	24.306	26.026
VPS35-KO	26.87	20.1	25.13	24.58	30.97			Plate 3	11.986	10.982	22.32	24.648
Plate 2								Plate 4	12.654	13.226	22.374	25.872
Huh7-WT	11.68	13.37	12.43	11.35	10.56			Plate 5	7.42	7.224	23.338	28.066
FIP200-KO	8.99	9.54	12.05	11.12	10.82			Plate 6	9.638	9.178	23.962	26.536
FIP200-KO +siATG5	25.21	25.13	24.08	25.23	21.88			Plate 7	10.57	11.55	24.984	32.106
VPS35-KO	24.04	27.34	25.68	26.23	26.84			Plate 8	10.692	12.816	27.756	33.74
Plate 3
Huh7-WT	11.97	13.15	11.63	12.53	10.65
FIP200-KO	12.04	10.45	12.08	9.33	11.01
FIP200-KO +siATG5	23.31	23.77	20.85	23.36	20.31
VPS35-KO	25.45	21.17	25.23	25.75	25.64
Plate 4
Huh7-WT	10.89	13.27	12.9	14.18	12.03
FIP200-KO	13.35	12.46	13.81	13.3	13.21
FIP200-KO +siATG5	21.33	26.55	21.56	19.96	22.47
VPS35-KO	22.91	24.71	26.61	25.18	29.95
Plate 5
Huh7-WT	7.64	5.83	6.46	8.47	8.7
FIP200-KO	4.61	5.29	4.78	10.67	10.77
FIP200-KO +siATG5	22.35	23.17	25.01	24.36	21.8
VPS35-KO	23.64	27.2	25.48	32.78	31.23
Plate 6
Huh7-WT	10.54	7.43	7.11	12.11	11
FIP200-KO	11.13	9.1	9.65	7.51	8.5
FIP200-KO +siATG5	26.12	19.48	26.66	24.18	23.37
VPS35-KO	25.77	27.61	25.77	28.37	25.16
Plate 7
Huh7-WT	10.75	11.16	9.96	10.48	10.5
FIP200-KO	8.72	11.57	11.49	12.07	13.9
FIP200-KO +siATG5	21.57	25.1	27.63	27.01	23.61
VPS35-KO	31.52	35	26.29	33.16	34.56
Plate 8
Huh7-WT	7.43	11.42	12.13	11.28	11.2
FIP200-KO	10.53	10.16	14.5	14.54	14.35
FIP200-KO +siATG5	25.66	29.03	28.13	28.16	27.8
VPS35-KO	30.87	35.61	36.06	35.04	31.12

## Sheet: Panel F
GLUT1-LAMP2 Overlap (%LAMP2)
Plate 1
Huh7-WT	7.31	7.87	7.96	7.38	7.3			Averages	Huh7-WT	FIP200-KO	FIP200-KO +siATG5	VPS35-KO
FIP200-KO	7.15	7.78	6.75	6.35	6.38			Plate 1	7.564	6.882	33.584	43.958
FIP200-KO +siATG5	34.56	35.81	30.65	31.25	35.65			Plate 2	7.046	6.49	37.796	44.826
VPS35-KO	43.81	36.45	45.94	45.55	48.04			Plate 3	7.062	6.912	34.436	43.6
Plate 2								Plate 4	8.034	8.448	34.478	45.614
Huh7-WT	6.9	8.2	6.96	6.59	6.58			Plate 5	5.292	5.024	38.506	47.79
FIP200-KO	6.03	6.08	6.9	7.02	6.42			Plate 6	6.122	5.57	38.97	45.254
FIP200-KO +siATG5	38.51	37.3	38.95	38.81	35.41			Plate 7	6.626	7.158	37.994	47.524
VPS35-KO	43.22	44.89	44.32	46.11	45.59			Plate 8	6.98	8.438	40.494	49.76
Plate 3
Huh7-WT	7.25	7.75	6.57	7.5	6.24
FIP200-KO	7.69	7.19	7.04	5.36	7.28
FIP200-KO +siATG5	34.77	34.81	33.5	35.22	33.88
VPS35-KO	44.39	39.39	45.36	44.53	44.33
Plate 4
Huh7-WT	7.18	8.27	8.08	9.17	7.47
FIP200-KO	8.25	8.21	8.56	8.68	8.54
FIP200-KO +siATG5	33.77	37.45	35.61	31.75	33.81
VPS35-KO	43.1	45.03	46.27	44.65	49.02
Plate 5
Huh7-WT	5.3	4.41	4.77	5.91	6.07
FIP200-KO	3.75	4.28	4.04	6.38	6.67
FIP200-KO +siATG5	39.87	38.41	39.25	38.83	36.17
VPS35-KO	44.65	48.02	48.61	48.91	48.76
Plate 6
Huh7-WT	6.75	5.3	4.84	7.07	6.65
FIP200-KO	6.02	6.3	5.64	4.82	5.07
FIP200-KO +siATG5	39.82	34.34	41.47	40.95	38.27
VPS35-KO	44.12	44.87	44.18	46.82	46.28
Plate 7
Huh7-WT	5.92	7.07	6.48	7.44	6.22
FIP200-KO	6.26	7.21	7.07	7.01	8.24
FIP200-KO +siATG5	34.32	38.61	40.47	39.58	36.99
VPS35-KO	46.7	49.33	44.63	47.94	49.02
Plate 8
Huh7-WT	4.98	7.64	7.47	7.96	6.85
FIP200-KO	6.72	7.15	9.16	9.77	9.39
FIP200-KO +siATG5	39.18	41.11	42.08	42.41	37.69
VPS35-KO	47.84	50.01	51.83	50.03	49.09
