# Supplementary material for: Noncanonical roles of ATG5 and membrane atg8ylation in retromer assembly and function
Source: eLife. 2025 Jan 7;13:RP100928. doi: 10.7554/eLife.100928 (PMC11706607; doi:10.7554/eLife.100928)
Supplement: Figure 6—figure supplement 1—source data 1. [file elife-100928-fig6-figsupp1-data1.xlsx]

## Sheet: Panel D
Glut1 Puncta
Plate 1
Huh7-WT	22.79	22.46	19.31	19.48	20.66		Averages	Huh7-WT	FIP200-KO	FIP200-KO +siATG5	VPS35-KO
FIP200-KO	23.02	20.02	15.65	20.46	16.64		Plate 1	20.94	19.158	27.242	33.762
FIP200-KO +siATG5	29.33	28.38	28.96	24.06	25.48		Plate 2	22.55	22.116	27.358	31.764
VPS35-KO	36.47	33.23	32.74	34.02	32.35		Plate 3	21.47	21.57	26.992	29.686
Plate 2							Plate 4	20.812	20.836	26.422	28.316
Huh7-WT	23.46	19.44	23.13	23.48	23.24		Plate 5	18.094	15.958	25.612	30.038
FIP200-KO	23.45	20.49	22.99	21.49	22.16		Plate 6	14.636	16.976	20.414	23.216
FIP200-KO +siATG5	27.3	27.89	27.64	29.02	24.94		Plate 7	17.856	17.232	22.688	22.662
VPS35-KO	33.69	30.25	32.51	32.13	30.24		Plate 8	18.218	18.008	22.32	23.44
Plate 3
Huh7-WT	22.27	19.66	22.36	20.38	22.68
FIP200-KO	20.78	20.21	21.97	21.84	23.05
FIP200-KO +siATG5	27.06	27.52	28.54	27.85	23.99
VPS35-KO	29.82	32.05	30.06	29.34	27.16
Plate 4
Huh7-WT	18.96	21.02	20.42	21.73	21.93
FIP200-KO	21.88	20.35	21.12	19.65	21.18
FIP200-KO +siATG5	26.79	26.38	26.17	25.94	26.83
VPS35-KO	27.54	28.51	28.67	28.64	28.22
Plate 5
Huh7-WT	19.62	18.63	16.78	14.34	21.1
FIP200-KO	17.23	17.45	14.58	18.02	12.51
FIP200-KO +siATG5	25.43	25.56	26.78	27.61	22.68
VPS35-KO	28.55	27.88	27.78	32.84	33.14
Plate 6
Huh7-WT	13.05	15.05	15.82	13.28	15.98
FIP200-KO	17.46	17.83	15.49	18.39	15.71
FIP200-KO +siATG5	22.27	19.3	19.52	19.68	21.3
VPS35-KO	26.09	22.35	21.86	21.9	23.88
Plate 7
Huh7-WT	18.86	18.36	17.48	17.71	16.87
FIP200-KO	17.33	17.37	16.28	16.66	18.52
FIP200-KO +siATG5	24.45	24.27	21.78	21.7	21.24
VPS35-KO	22.95	24.24	24.32	20.65	21.15
Plate 8
Huh7-WT	18.65	16.53	16.54	19.54	18.18	16.54	18.3	18.53
FIP200-KO	19.64	18.82	19.22	17.47	19.5	18.49	16.68	17.9
FIP200-KO +siATG5	23.01	22.46	22.63	23.27	22.67	23.39	20.41	21.86
VPS35-KO	23.26	21.86	24.44	26.47	23.23	23.27	23.07	21.16

## Sheet: Panel F
GLUT1-LAMP2 Overlap (%LAMP2)
Plate 1
Huh7-WT	41.1	41.18	39.48	38.44	37.99		Averages	Huh7-WT	FIP200-KO	FIP200-KO +siATG5	VPS35-KO
FIP200-KO	40.25	34.24	30.98	34.69	34.26		Plate 1	39.638	34.884	52.428	63.716
FIP200-KO +siATG5	54.82	52.63	54.03	47.43	53.23		Plate 2	41.828	36.886	56.728	63.75
VPS35-KO	64.35	64.87	60.5	63.72	65.14		Plate 3	41.34	36.272	53.708	63.562
Plate 2							Plate 4	38.686	37.208	57.386	64.164
Huh7-WT	41.97	38.6	39.93	42.31	46.33		Plate 5	42.366	35.088	56.83	65.986
FIP200-KO	36.82	35.18	37.41	36.18	38.84		Plate 6	44.084	40.59	57.5	62.584
FIP200-KO +siATG5	54.91	56.21	57.37	56.55	58.6		Plate 7	46.75	40.652	58.54	61.376
VPS35-KO	65.52	61.73	62.29	63.11	66.1		Plate 8	46.8163	43.0012	58.2762	62.7212
Plate 3
Huh7-WT	40.99	38.65	40.79	47.55	38.72
FIP200-KO	35.38	34.37	35.4	37.3	38.91
FIP200-KO +siATG5	53.92	54.25	52.15	54.67	53.55
VPS35-KO	64.92	64.26	62.04	62.28	64.31
Plate 4
Huh7-WT	35.57	37.84	37.62	40.3	42.1
FIP200-KO	38.46	35.31	37.02	35.26	39.99
FIP200-KO +siATG5	55.58	59.27	56.85	56.37	58.86
VPS35-KO	64.04	61.88	64.02	65.32	65.56
Plate 5
Huh7-WT	45.98	45.53	42.4	33.97	43.95
FIP200-KO	39.58	37.24	35.08	39.36	24.18
FIP200-KO +siATG5	59.87	55.49	58.04	55.43	55.32
VPS35-KO	68.16	66.14	63.15	65.82	66.66
Plate 6
Huh7-WT	44.64	44.79	44.45	42.06	44.48
FIP200-KO	42.68	40.69	39.3	41.43	38.85
FIP200-KO +siATG5	58.33	56.29	57.42	57.27	58.19
VPS35-KO	64.34	61.47	63.41	61.73	61.97
Plate 7
Huh7-WT	47.65	46.89	45.68	46.06	47.47
FIP200-KO	39.84	38.02	37.72	41.76	45.92
FIP200-KO +siATG5	59.4	58.76	58.81	57.34	58.39
VPS35-KO	60.48	63.15	62.04	61.66	59.55
Plate 8
Huh7-WT	48.03	45.26	45.68	47.97	46.34		47.59	48.21
FIP200-KO	44.26	43.96	42.6	40.5	43.32		40.12	45.66
FIP200-KO +siATG5	59.16	59.18	57.33	58.9	56.18		58.84	56.91
VPS35-KO	60.97	63.95	63.91	63.01	61.96		63.16	61.1
