# Supplementary material for: Noncanonical roles of ATG5 and membrane atg8ylation in retromer assembly and function
Source: eLife. 2025 Jan 7;13:RP100928. doi: 10.7554/eLife.100928 (PMC11706607; doi:10.7554/eLife.100928)
Supplement: Figure 6—source data 3. [file elife-100928-fig6-data3.xlsx]

## Sheet: Panel B
GLUT1 Puncta
Plate 1
Huh7-WT	9.94	8.01	11.33	11.94	13.8	17.26		Averages	Huh7-WT	ATG3-KO	ATG5-KO	ATG7-KO	ATG16L1-KO	VPS35-KO
ATG3-KO	24.97	23	24.77	24.77	24.15	28.31		Plate 1	13.82	25.0325	31.6287	25.875	28.3775	32.2525
ATG5-KO	28.27	33.04	33.21	32.43	32.39	37.33		Plate 2	14.2812	25.2687	30.9075	26.9625	27.7287	34.54
ATG7-KO	29.22	24.47	24.87	19.76	26.25	29.99		Plate 3	18.4087	31.9462	35.775	29.185	32.1487	38.3912
ATG16L1-KO	34.64	30.39	25.99	27.21	27.22	28.05		Plate 4	19.2913	33.7263	33.3113	29.2613	29.525	36.8937
VPS35-KO	39.13	31.21	32.99	31.38	29.71	31.62		Plate 5	15.275	22.7662	26.7937	24.565	23.7637	32.2362
Plate 2								Plate 6	15.52	24.865	30.4562	26.1675	26.19	35.645
Huh7-WT	14.45	16.3	11.19	9.53	15.68	13.84
ATG3-KO	19.21	30.26	26.52	28.98	23.62	26.2
ATG5-KO	28.15	28.73	33.26	32.98	34.21	36
ATG7-KO	28.8	27.55	26.42	18.09	29.93	29.41
ATG16L1-KO	30.83	28.59	31.78	24.06	21.57	24.29
VPS35-KO	42.12	40.48	35.41	28.57	33.03	32.43
Plate 3
Huh7-WT	16.09	20.24	18.24	20.12	15.05	18.76
ATG3-KO	33.81	33.9	31.62	39.21	33.36	29.82
ATG5-KO	35.81	37.68	32.3	39.14	26.36	34.31
ATG7-KO	25.77	25.58	26.19	32.3	26.73	37.3
ATG16L1-KO	34.05	27.1	31.42	30.01	30.44	33.54
VPS35-KO	35.73	41.35	26.83	39.28	38.78	37.79
Plate 4
Huh7-WT	15.14	17.43	23.96	18.62	16.69	19.55
ATG3-KO	35.5	29.53	35.52	35.77	28.25	34.94
ATG5-KO	32.3	29.94	35.88	38.61	30.48	33.04
ATG7-KO	22.93	32.8	31.55	31.33	26.01	31.34
ATG16L1-KO	31.87	27.82	29.52	30.4	30.73	30.59
VPS35-KO	37.35	40.97	36.84	28.54	23.6	39.67
Plate 5
Huh7-WT	15.54	15.08	10.35	13.11	16.92	17.26
ATG3-KO	19.97	18.79	20.9	21.87	21.95	25.15
ATG5-KO	25.2	30.67	21.37	29.66	23.73	27
ATG7-KO	25.58	27.54	24.31	18.39	21.38	26.45
ATG16L1-KO	22.58	25.91	23.65	15.57	24.14	23.23
VPS35-KO	25.75	34.98	30.76	34.51	32.77	28.22
Plate 6
Huh7-WT	15.45	19.77	15.15	9.58	18.01	12.31
ATG3-KO	22.99	23.87	26.5	23.04	24.12	26.69
ATG5-KO	35.27	29.97	35.68	33.06	31.41	26.86
ATG7-KO	28.07	28.61	29.05	26.31	18.56	22.92
ATG16L1-KO	28.31	28.58	25.4	26.44	23.05	22.02
VPS35-KO	37.11	32.98	26.43	35.36	34.72	41.56

## Sheet: Panel C
GLUT1-LAMP2 Overlap (%LAMP2)
Plate 1
Huh7-WT	26.21	23.46	19.91	16.73	19.21	21.23	22	23.37		Averages	Huh7-WT	ATG3-KO	ATG5-KO	ATG7-KO	ATG16L1-KO	VPS35-KO
ATG3-KO	37.02	38.63	37.2	35.85	37.35	36.63	37.95	40.57		Plate 1	21.515	37.65	53.9013	37.5162	43.0725	55.0587
ATG5-KO	52.12	52.56	53.02	53.64	54.51	53.86	52.56	58.94		Plate 2	21.6113	36.5562	55.37	37.31	40.71	55.5138
ATG7-KO	35.86	38.51	36.94	36.76	40.35	33.98	39.31	38.42		Plate 3	22.07	39.7737	56.56	40.0237	43.3225	56.8275
ATG16L1-KO	38.91	43.39	45.07	44.09	44.85	42.55	42.75	42.97		Plate 4	22.71	40.4225	54.5	39.2438	41.945	57.12
VPS35-KO	55.79	49.66	55.68	53.79	55.02	57.12	56.14	57.27		Plate 5	23.17	39.2075	55.2287	40.5325	42.7413	58.6688
Plate 2										Plate 6	22.945	40.1412	55.17	40.9125	43.91	59.3987
Huh7-WT	24.89	24.13	19.23	19.52	18.77	20.3	23.03	23.02
ATG3-KO	30.61	37.7	33.11	39.54	39.29	38.38	33.9	39.92
ATG5-KO	54.15	52.95	52.07	57.6	53.34	58.8	56.05	58
ATG7-KO	38.48	37.57	36.52	38.43	37.92	31.91	38.86	38.79
ATG16L1-KO	37.35	43.91	39.14	44.67	41.79	39.81	39.77	39.24
VPS35-KO	53.68	50.3	55.81	58.43	57.94	56.1	56.25	55.6
Plate 3
Huh7-WT	22.64	21.07	21.39	22.11	24.04	22.08	21.7	21.53
ATG3-KO	42.11	32.11	39.38	41.71	39.24	43.4	39.69	40.55
ATG5-KO	59.43	55.68	57.18	58.94	54.41	55.3	54.43	57.11
ATG7-KO	39.6	43.21	37.76	36.87	37.09	41.04	38.05	46.57
ATG16L1-KO	44.89	43.6	42.58	42.02	43.67	42.87	42.3	44.65
VPS35-KO	57.73	57.47	55.36	60.26	49.46	57.67	58.39	58.28
Plate 4
Huh7-WT	23.62	24.28	22.53	21.33	25.94	20.86	19.48	23.64
ATG3-KO	43.91	39.33	40.97	38.55	38.93	39.46	40.03	42.2
ATG5-KO	57.3	51.51	53.83	51.77	54.99	55.44	54.28	56.88
ATG7-KO	40.6	37.07	35.78	39.26	40.22	38.36	39.87	42.79
ATG16L1-KO	42	39.3	45	40.59	40.31	42.26	42.44	43.66
VPS35-KO	59.45	56.5	55.91	58.59	57.27	56.1	54.44	58.7
Plate 5
Huh7-WT	23.73	21.35	22.76	21.69	23.15	24	23.49	25.19
ATG3-KO	40.68	38.57	36.27	35.08	42.86	40.24	38.38	41.58
ATG5-KO	58.6	45.98	58.48	55.58	50.7	57.42	57.51	57.56
ATG7-KO	40.99	39.48	40.11	43.41	40.13	38.47	39.01	42.66
ATG16L1-KO	43.23	44.31	41.75	44.21	44.95	37.62	40.8	45.06
VPS35-KO	60.6	57.84	56.71	58.95	59.64	58.79	58.06	58.76
Plate 6
Huh7-WT	27.57	18.52	22.38	25.69	21.09	20.74	25.38	22.19
ATG3-KO	40.27	39.74	38.24	39.86	40.4	40.06	40.44	42.12
ATG5-KO	50.8	48.22	58.91	57.63	60.17	57.35	58.96	49.32
ATG7-KO	42.31	40.9	40.59	41.2	41.98	41.03	39.23	40.06
ATG16L1-KO	45.45	44.85	41.53	42.2	44.29	45.44	43.36	44.16
VPS35-KO	60.41	55.42	58.36	59.94	56.91	59.06	61.39	63.7

## Sheet: Panel E
			WT	ATG5KO	VPS35KO
		EXPT. 1	0.30441	1.01594	1.36813
		EXPT. 2	0.31907	1.44408	1.44102
		EXPT. 3	0.17333	1.55783	1.36247
		Fold change of RAB7 in LysoIPs (Normalized to LAMP2)

## Sheet: Panel G
GLUT1 Puncta
Plate 1
Huh7-WT	ATG13-KO	FIP200-KO	ATG5-KO	VPS35-KO		Averages	Huh7-WT	ATG13-KO	FIP200-KO	ATG5-KO	VPS35-KO
20.45	20.31	17.44	32.68	32.64		Plate 1	18.9138	17.3388	16.6225	35.1288	35.66
17.68	16.19	17.41	33.88	35.65		Plate 2	21.1475	19.7825	20.6263	44.3325	44.785
18.72	16.5	14.82	32.27	33.94		Plate 3	23.69	21.9238	22.0975	43.8325	43.345
19.84	16.9	15.92	34.21	36.01		Plate 4	21.95	21.745	21.3813	45.875	43.8163
17.58	16.23	17.66	34.99	35.07		Plate 5	21.0825	19.3925	19.5888	35.355	35.235
17.77	16.47	17.48	37.66	38.76
21.56	17.39	13.89	39.14	38.18
17.71	18.72	18.36	36.2	35.03
Plate 2
Huh7-WT	ATG13-KO	FIP200-KO	ATG5-KO	VPS35-KO
27.54	21.81	24.1	47.96	42.19
23.46	20.71	23.89	43.86	45.18
24.15	15.81	22.44	45.35	46.71
20.92	21.66	18.13	45.63	43.76
21.02	23.61	21.02	41.06	47.94
13.67	18.95	19.66	45.79	43.25
19.21	19.48	17.72	41.03	44.97
19.21	16.23	18.05	43.98	44.28
Plate 3
Huh7-WT	ATG13-KO	FIP200-KO	ATG5-KO	VPS35-KO
22.38	22.32	22.04	42.7	38.46
23.41	22.68	20.98	45.44	44.54
26.59	19.71	18.06	43.83	46.45
23.96	22.3	23.88	45.04	43.31
24.76	21.35	21.36	45.75	40.69
21.27	22.96	21.24	39.28	43.56
21.24	20.61	21.74	42.18	44.21
25.91	23.46	27.48	46.44	45.54
Plate 4
Huh7-WT	ATG13-KO	FIP200-KO	ATG5-KO	VPS35-KO
21.34	21.78	16.85	44.59	43.91
23.78	19	19.65	49.24	43.09
23.37	21.12	26.46	43.75	43.13
22.48	23.65	18.74	47.03	43.59
20.08	20.1	22.74	43.53	44.74
20.43	21.66	22.87	45.88	43.14
21.23	22.83	18.35	47.27	46.24
22.89	23.82	25.39	45.71	42.69
Plate 5
Huh7-WT	ATG13-KO	FIP200-KO	ATG5-KO	VPS35-KO
20.97	15	19.04	33.43	36.5
15.33	19.89	16.65	39.77	35.35
24.07	17.22	19	28.63	37.25
23.48	18.8	21.21	37.03	35.36
14.35	21.27	20.76	37.91	34.9
18.98	20.17	19.31	33.38	34.37
24.62	19.61	18.37	37.99	34.17
26.86	23.18	22.37	34.7	33.98

## Sheet: Panel H
GLUT1-LAMP2 Overlap (%LAMP2)
Plate 1
Huh7-WT	ATG13-KO	FIP200-KO	ATG5-KO	VPS35-KO		Averages	Huh7-WT	ATG13-KO	FIP200-KO	ATG5-KO	VPS35-KO
31.51	32.96	30.24	64.52	63.29		Plate 1	28.37	26.7788	26.115	64.925	64.6713
27.71	25.93	28.84	64.66	63.91		Plate 2	29.395	28.6413	28.0037	64.8725	65.145
28.24	25.7	24.74	63.12	64.48		Plate 3	31.4888	30.02	29.4325	64.5487	65.4213
28.15	24.73	24.04	65.73	64.28		Plate 4	27.3475	25.8912	25.8238	64.7175	65.1225
26.63	24.41	25.18	65.96	65.21		Plate 5	30.9387	30.87	31.525	64.6237	65.0537
26.63	24.82	24.52	63.66	66.28
29.52	26.1	23.54	65.55	65.61
28.57	29.58	27.82	66.2	64.31
Plate 2
Huh7-WT	ATG13-KO	FIP200-KO	ATG5-KO	VPS35-KO
33.47	31.74	29.64	66.47	64.18
30.2	28.91	29.82	65.31	64.97
30.96	28.91	29.39	63.43	66.82
28.59	28.71	26.76	64.75	63.26
29.23	29.92	28.62	66.03	66.37
29.05	27.42	25.29	64.59	64.07
24.18	25.06	25.64	62.51	65.47
29.48	28.46	28.87	65.89	66.02
Plate 3
Huh7-WT	ATG13-KO	FIP200-KO	ATG5-KO	VPS35-KO
30.32	30.48	31.34	64.85	63.9
33.34	31.52	28.91	63.72	64.54
31.91	27.03	27.78	63.39	68.73
31.17	33.05	30.37	65.52	65.2
33.61	27.68	27.86	66.95	62.25
28.39	30.02	30.98	64.19	66.03
30.17	29.55	27.85	62.53	66.94
33	30.83	30.37	65.24	65.78
Plate 4
Huh7-WT	ATG13-KO	FIP200-KO	ATG5-KO	VPS35-KO
29.12	28.6	24.54	65.47	67.33
27.14	24.16	24.83	64.36	63.54
27.39	23.71	28.96	64.48	64.52
27.81	25.2	26.55	65.02	65.21
27.08	24.75	25.86	63.66	66.19
27.84	28.2	24.26	64.4	64.38
24.81	24.84	23.32	65.11	65.01
27.59	27.67	28.27	65.24	64.8
Plate 5
Huh7-WT	ATG13-KO	FIP200-KO	ATG5-KO	VPS35-KO
30.05	31.54	33.67	65.2	63.93
29.36	29.97	30.85	65.71	63.02
31.15	32.25	29.65	61.05	65.57
29.04	30.99	30.72	62.76	67.02
32.22	28.91	29.87	64.88	66.63
31.77	28.38	31.4	67.46	65.17
31.54	32.55	31.96	64.94	67.23
32.38	32.37	34.08	64.99	61.86
