# Supplementary material for: Noncanonical roles of ATG5 and membrane atg8ylation in retromer assembly and function
Source: eLife. 2025 Jan 7;13:RP100928. doi: 10.7554/eLife.100928 (PMC11706607; doi:10.7554/eLife.100928)
Supplement: Figure 7—figure supplement 1—source data 3. [file elife-100928-fig7-figsupp1-data3.xlsx]

## Sheet: Panel C
		Control	Monensin	LLOMe	Bafilomycin
	EXPT. 1	1.92683	1.77273	1.95	2.13158
	EXPT. 2	2.05263	1.925	1.83333	1.97436
	EXPT. 3	1.83333	1.77273	2.02632	2
		TBC1D5 interacting with LC3A
		(Intensity values in co-IP relative to to Iinput)

## Sheet: Panel D
			Control	Monensin	LLOMe	Bafilomycin
		EXPT. 1	1.70732	1.75	1.625	1.86842
		EXPT. 2	1.78947	1.875	1.78571	1.79487
		EXPT. 3	1.97619	1.97727	1.86842	1.8718
		VPS355 interacting with LC3A
		(Intensity values in co-IP relative to to Iinput)
