# Supplementary material for: Noncanonical roles of ATG5 and membrane atg8ylation in retromer assembly and function
Source: eLife. 2025 Jan 7;13:RP100928. doi: 10.7554/eLife.100928 (PMC11706607; doi:10.7554/eLife.100928)
Supplement: Figure 7—source data 1. [file elife-100928-fig7-data1.xlsx]

## Sheet: Panel B
LC3 Puncta
Plate 1			Full Media (FM/Ctrl)						LLOME 1mM (30min)					Averages	HeLa WT + FM	HeLa WT + LLOME	VPS35-KO + FM	VPS35-KO + LLOME
HeLa	9.48	9.16	10.22	11.2	10.22	10.05	18.98	17.93	17.67	19.2	18.15	16.65		Plate 1	10.2608	18.4583	15.3933	39.4033
WT	10.51	10.35	10.78	10.22	10.63	10.31	19.12	19.75	18.92	21.05	17.56	16.52		Plate 2	11.5633	19.2808	16.34	40.2083
VPS35-KO	16.86	16.14	14.65	14.84	15.83	14.04	35.44	40.63	39.86	40.43	40.81	39.25		Plate 3	11.705	18.7425	15.8567	40.68
														Plate 4	10.6092	17.615	16.9433	40.7617
Plate 2			Full Media (FM/Ctrl)						LLOME 1mM (30min)					Plate 5	9.23167	17.9392	15.7933	41.9067
HeLa	10.65	10.8	11.85	11.68	11.05	10.98	19.27	18.2	17.88	20.74	18.68	19.18
WT	11.73	13	11.76	11.95	11.67	11.64	20	19.4	18.88	21.93	19.2	18.01
VPS35-KO	18.66	15.55	16.39	15.88	16.12	15.44	36.88	41.2	40.16	41.29	40.7	41.02
Plate 3			Full Media (FM/Ctrl)						LLOME 1mM (30min)
HeLa	11.19	11.87	12.35	11.63	10.72	11.02	21.25	19.12	18.44	19.39	18.79	16.15
WT	12.69	11.9	11.89	12.49	11.27	11.44	18.92	18.33	18.94	19.87	18.4	17.31
VPS35-KO	17.16	17.04	15.06	15.47	14.63	15.78	39.12	42.62	39.07	40.43	40.81	42.03
Plate 4			Full Media (FM/Ctrl)						LLOME 1mM (30min)
HeLa	9.89	10.28	11.84	10.93	9.44	10.37	18.53	17.1	17.66	18.06	17.8	14.11
WT	11.69	10.65	10	10.82	10.79	10.61	17.58	18.91	19.14	20.04	17.03	15.42
VPS35-KO	18.56	17.73	16.4	15.91	15.78	17.28	40.96	42.22	40.52	41.14	41	38.73
Plate 5			Full Media (FM/Ctrl)						LLOME 1mM (30min)
HeLa	7.71	8.65	9.05	10.08	8.53	9.14	18.02	16.46	16.54	17.54	17.85	18.01
WT	9.13	9.91	8.75	9.52	9.88	10.43	18.02	19.65	18.43	19.15	17.82	17.78
VPS35-KO	16.77	15.56	13.78	15.91	16.57	16.17	41.64	42.27	40.34	42.74	42.83	41.62

## Sheet: Panel D
GLUT1 Puncta
Plate 1
Full Media (Ctrl)	9.46	8.1	10.55	8.13	9.11	7.68		Averages	Ctrl	Monensin	LLOME	Baf A1
Monensin	8	9.76	10.88	10.33	10.62	9.15		Plate 1	8.83833	9.79	20.9633	13.2017
LLOME	22.85	22.05	20.3	20.63	21.82	18.13		Plate 2	8.2	9.47333	19.4017	12.0083
Baf A1	12.23	11.55	16.28	14.69	15.67	8.79		Plate 3	8.49833	9.84333	18.9183	11.92
Plate 2								Plate 4	9.5	9.535	18.585	12.5317
Full Media (Ctrl)	7.22	9.27	8.06	8.38	8.86	7.41		Plate 5	7.54333	10.0233	21.4017	12.8317
Monensin	10.21	10.09	9.9	9.01	8.04	9.59		Plate 6	7.695	9.845	20.2617	11.8417
LLOME	16.83	19.47	19.84	21.43	19.74	19.1
Baf A1	8.77	12.05	13.32	12.3	13.23	12.38
Plate 3
Full Media (Ctrl)	8.72	8.97	7.4	9.85	7.59	8.46
Monensin	9.01	10.23	9.39	11.34	9.38	9.71
LLOME	16.97	21.34	18.59	20.57	17.84	18.2
Baf A1	10.62	12.51	12.86	12.56	10.77	12.2
Plate 4
Full Media (Ctrl)	9.32	8.69	9.89	10.52	9.64	8.94
Monensin	9.21	7.73	10.05	10.76	10.7	8.76
LLOME	21.17	19.54	18.52	17.21	19.29	15.78
Baf A1	12.35	13.27	13.24	12.78	13.27	10.28
Plate 5
Full Media (Ctrl)	8.77	7.16	7.9	7.36	6.48	7.59
Monensin	10.22	9.53	10.23	10.2	10.82	9.14
LLOME	22.51	20.91	22.72	24.04	22.14	16.09
Baf A1	14.17	11.32	9.92	15.54	15.41	10.63
Plate 6
Full Media (Ctrl)	6.66	6.95	8.74	8.13	8.28	7.41
Monensin	8.95	10.42	10.24	11.1	9.62	8.74
LLOME	14.85	21.56	22.36	20.13	21.8	20.87
Baf A1	8.94	14.49	11.18	11.19	13.47	11.78

## Sheet: Panel E
GLUT1-LAMP2 Overlap (%LAMP2)
Plate 1
Full Media (Ctrl)	7.46	7.23	8.07	6.9	6.79	6.94		Averages	Ctrl	Monensin	LLOME	Baf A1
Monensin	10.45	11.06	10.31	10.92	12.22	11.25		Plate 1	7.23167	11.035	15.4	13.4583
LLOME	16.29	15.7	14.35	15.27	15.88	14.91		Plate 2	6.97167	10.75	14.4383	13.2033
Baf A1	12.57	12.35	14.31	13.63	14.19	13.7		Plate 3	6.58167	11.205	14.02	13.6683
Plate 2								Plate 4	6.86667	10.7283	14.655	13.6117
Full Media (Ctrl)	7.13	7.35	6.25	6.78	7.42	6.9		Plate 5	6.48333	10.8317	16.7633	13.045
Monensin	11.43	10.73	11.34	9.82	10.11	11.07		Plate 6	6.37833	10.6683	16.0067	12.9217
LLOME	13.42	14.31	14.39	15.51	14.84	14.16
Baf A1	12.09	12.7	13.81	13.16	13.92	13.54
Plate 3
Full Media (Ctrl)	6.91	6.8	6.26	7.08	5.64	6.8
Monensin	9.96	12.19	10.61	12.75	10.7	11.02
LLOME	13.93	15.31	13.65	14.37	12.93	13.93
Baf A1	13.96	14.12	14.22	13.28	13.09	13.34
Plate 4
Full Media (Ctrl)	7.04	6.94	7.12	6.91	6.71	6.48
Monensin	10.37	9.05	11.62	11.56	11.54	10.23
LLOME	16.15	15.63	14.01	14.72	14.5	12.92
Baf A1	13.09	14.29	13.63	13.54	13.09	14.03
Plate 5
Full Media (Ctrl)	7.17	6.23	6.78	6.24	5.91	6.57
Monensin	11.19	10.23	10.99	11.35	11.01	10.22
LLOME	18.66	15.88	16.47	17.76	16.57	15.24
Baf A1	13.91	12.09	11.42	13.96	13.73	13.16
Plate 6
Full Media (Ctrl)	5.57	6.29	6.78	6.37	6.68	6.58
Monensin	10.66	10.2	11.32	10.61	10.77	10.45
LLOME	14.03	16.45	17.06	15.8	16.7	16
Baf A1	12.7	13.96	12.16	11.76	13.92	13.03

## Sheet: Panel F
GLUT1 Puncta
Plate 1
	+eGFP	4.45	6.46	8.51	5.6	8.45	5.85		Averages			Huh7-WT
Huh7-	+Rab7-WT	7.08	7.94	8.3	9.15	8.58	9.55			+eGFP	+Rab7-WT	+Rab7-Q67L	+Rab7-T22N
WT	+Rab7-Q67L	10.95	9.95	10.6	11.86	11.66	11.18		Plate 1	6.55333	8.43333	11.0333	9.35167
	+Rab7-T22N	9.37	8.76	11.54	10.22	9	7.22		Plate 2	10.6217	11.2517	17.0683	14.5767
Plate 2									Plate 3	5.74833	8.94333	12.365	10.88
	+eGFP	8.21	10.68	11.97	12	10.89	9.98
Huh7-	+Rab7-WT	10.64	10.32	12.2	11.24	12.81	10.3
WT	+Rab7-Q67L	13.69	17.68	18.58	18.61	17.36	16.49
	+Rab7-T22N	11.57	15.97	18.26	15.35	15.52	10.79
Plate 3
	+eGFP	3.59	6.36	5.67	6.5	5.86	6.51
Huh7-	+Rab7-WT	7.01	9.03	10.18	9.12	9.2	9.12
WT	+Rab7-Q67L	10.15	12.43	12.32	12.44	12.78	14.07
	+Rab7-T22N	8.18	10.82	11.61	11.96	12.35	10.36

## Sheet: Panel H
GLUT1-LAMP2 Overlap (%LAMP2)
Plate 1
	+eGFP	4.08	4.14	6.06	3.84	6.5	4.01		Averages			Huh7-WT
Huh7-	+Rab7-WT	5.93	7.21	5.16	6.97	5.77	6.19			+eGFP	+Rab7-WT	+Rab7-Q67L	+Rab7-T22N
WT	+Rab7-Q67L	9.04	8.81	8.06	9.67	8.2	7.86		Plate 1	4.77167	6.205	8.60667	6.40167
	+Rab7-T22N	6.1	6.28	8.5	6.61	5.4	5.52		Plate 2	6.26167	7.79667	11.1317	9.39333
Plate 2									Plate 3	3.40833	4.795	6.98833	5.93
	+eGFP	5.47	6.08	5.98	7.57	5.81	6.66
Huh7-	+Rab7-WT	7.09	8.36	8.34	7.69	8.79	6.51
WT	+Rab7-Q67L	9.34	13.01	12.17	11.08	11.1	10.09
	+Rab7-T22N	6.66	10.43	10.01	10.49	10.25	8.52
Plate 3
	+eGFP	2.13	3.51	3.33	3.67	3.3	4.51
Huh7-	+Rab7-WT	3.62	5.36	5.44	4.85	4.73	4.77
WT	+Rab7-Q67L	6.42	7.48	7.17	7.29	6.42	7.15
	+Rab7-T22N	4.4	6.07	5.72	6.36	6.52	6.51

## Sheet: Panel I
GLUT1 Puncta
Plate 1
Huh7-WT	+Flag	9.27	10.34	10.35	8.78	8.49	6.66	7.47	16.37			Averages	Huh7-WT		ATG16L1-KO
ATG16L1-	+Flag	17.49	18.18	14.19	12.32	14.49	21.27	21.04	17.49				+Flag	+Flag	+Flag-ATG16L1-FL	+Flag-ATG16L1-E230
KO	+Flag-ATG16L1-FL	11.83	16.44	10.9	17	10.1	12.59	8.97	9.05			Plate 1	9.71625	17.0587	12.11	13.0675
	+Flag-ATG16L1-E230	11.68	13.64	10.62	12.87	18.49	16.96	10.63	9.65			Plate 2	8.8275	18.1125	12.3625	13.2262
Plate 2												Plate 3	8.5675	22.0887	13.2213	13.1412
Huh7-WT	+Flag	8.02	9.06	9.43	8.4	7.87	7.6	6.52	13.72			Plate 4	7.30125	16.8825	8.955	10.0475
ATG16L1-	+Flag	14.84	21.3	14.91	14.78	18.99	21.17	19.85	19.06			Plate 5	7.30125	16.8825	8.955	10.0475
KO	+Flag-ATG16L1-FL	11.93	13.05	17.03	10.94	14.05	11.01	10.93	9.96
	+Flag-ATG16L1-E230	9.63	13.25	12.23	15.3	16.63	15.55	13.92	9.3
Plate 3
Huh7-WT	+Flag	8.89	9.8	8.75	8.57	8.25	8.15	7.91	8.22
ATG16L1-	+Flag	24.11	19.67	21.27	17.01	21.3	22.38	26.59	24.38
KO	+Flag-ATG16L1-FL	11.7	13.31	15.3	12.65	20.19	11.98	11.13	9.51
	+Flag-ATG16L1-E230	12.01	14.96	9.69	8.21	15.65	21.4	16.72	6.49
Plate 4
Huh7-WT	+Flag	4.66	4.93	7.55	7.88	7.89	7.5	9.28	8.72
ATG16L1-	+Flag	13.57	24.07	17.92	15.9	14.81	20.56	16.42	11.81
KO	+Flag-ATG16L1-FL	7.19	7.43	16	6.65	7.05	12.8	9.08	5.44
	+Flag-ATG16L1-E230	6.43	8.35	9.2	13.12	17.05	12.48	8.4	5.35
Plate 5
Huh7-WT	+Flag	5.28	7.19	8.14	5.92	5.25	8.29	8.26	8.38
ATG16L1-	+Flag	19.46	24.61	23.32	19.9	22.62	25.21	22.73	21.73
KO	+Flag-ATG16L1-FL	10.09	12.27	14.74	14.72	14.26	13.92	10.6	10.4
	+Flag-ATG16L1-E230	11.08	9.83	15.01	13.24	14.2	9.21	7.4	9.36
