# Supplementary material for: Noncanonical roles of ATG5 and membrane atg8ylation in retromer assembly and function
Source: eLife. 2025 Jan 7;13:RP100928. doi: 10.7554/eLife.100928 (PMC11706607; doi:10.7554/eLife.100928)
Supplement: Figure 8—figure supplement 2—source data 1. [file elife-100928-fig8-figsupp2-data1.xlsx]

## Sheet: Panel B
	Averages	HeLa-WT	ATG5-KO	VPS35-KO
	Plate 1	82	70.5	65.4
	Plate 2	86	75.2	68.9
	Plate 3	86	72.2	65.9

## Sheet: Panel D
	Averages	HeLa-WT	ATG5-KO
	Plate 1	81.73	62.8
	Plate 2	88.21	71.6
	Plate 3	75.16	65.2
