# Supplementary material for: Noncanonical roles of ATG5 and membrane atg8ylation in retromer assembly and function
Source: eLife. 2025 Jan 7;13:RP100928. doi: 10.7554/eLife.100928 (PMC11706607; doi:10.7554/eLife.100928)
Supplement: Figure 8—figure supplement 3—source data 3. [file elife-100928-fig8-figsupp3-data3.xlsx]

## Sheet: Panel A-B
LC3B Puncta
Plate 1			Full Media (Ctrl)						EBSS (90min)					Averages	Ctrl	EBSS
Huh7-WT1	2.56	3.17	3.31	1.21	1.04	1.88	5.01	6.16	5.4	4.63	6.46	6.34		Huh7-WT1	2.195	5.66667
ATG3-KO	1.65	1.28	1.63	1.03	2.22	1.88	2.04	1.81	2.4	2.74	2.57	3.49		ATG3-KO	1.615	2.50833
ATG5-KO	1.63	1.27	1.06	1.72	2.12	2.17	2.99	2.41	2.74	3.25	2.37	3.73		ATG5-KO	1.66167	2.915
ATG7-KO	2.79	2.98	2.42	3.17	2.26	3.11	3.76	3.54	2.85	3.68	2.36	3.96		ATG7-KO	2.78833	3.35833
VPS35-KO	5.42	4.59	5.25	4.2	4.07	5.07	10.21	11.79	8.75	8.96	4.28	12.15		VPS35-KO	4.76667	9.35667
Huh7-WT2	5.62	5.04	2.94	3.65	3.62	2.45	2.02	7.04	7.5	8.17	2.37	3.14		Huh7-WT2	3.88667	5.04
Plate 2			Full Media (Ctrl)						EBSS (90min)					Averages	Ctrl	EBSS
Huh7-WT1	2.76	3.57	3.58	3.69	3.97	3.72	5.49	6.29	8.19	7.42	9.06	7.94		Huh7-WT1	3.54833	7.39833
ATG3-KO	2.16	1.77	2.45	2.08	2.1	2.51	3.44	2.52	2.53	2.47	1.95	2.48		ATG3-KO	2.17833	2.565
ATG5-KO	2.28	2.06	2.15	2.52	2.18	2.48	2.52	1.86	2.63	1.92	1.98	2.47		ATG5-KO	2.27833	2.23
ATG7-KO	2.94	3.07	3.85	3.14	3.2	3.41	3.55	2.56	3.73	2.82	3.38	3.3		ATG7-KO	3.26833	3.22333
VPS35-KO	7.52	8.11	7.83	7.58	8.07	7.82	16.05	15.06	14.95	14.49	15.41	15.93		VPS35-KO	7.82167	15.315
Huh7-WT2	3.36	4.8	4.7	3.62	4.23	3.36	6.89	7.22	6.23	7.99	6.6	7.62		Huh7-WT2	4.01167	7.09167
Plate 3			Full Media (Ctrl)						EBSS (90min)					Averages	Ctrl	EBSS
Huh7-WT1	2.65	2.7	3.41	3.1	3.6	3.05	5.48	5.74	4.97	6.92	5.94	4.91		Huh7-WT1	3.085	5.66
ATG3-KO	2.48	2.53	2.57	2.67	2.96	2.53	3.22	2.95	2.1	2.31	1.15	1.62		ATG3-KO	2.62333	2.225
ATG5-KO	2.46	2.98	2.99	3.22	3.28	3.38	2.96	3.05	2.82	2.58	2.29	2.13		ATG5-KO	3.05167	2.63833
ATG7-KO	3.67	3.21	3.01	3.55	4.37	3.52	4.1	3.46	3.36	3.24	3.72	2		ATG7-KO	3.555	3.31333
VPS35-KO	7.17	7.97	7.38	8.33	7.7	7.18	17.58	16.76	17.29	15.1	13.23	17.1		VPS35-KO	7.62167	16.1767
Huh7-WT2	3.33	3.77	3.63	3.78	3.69	4.12	4.19	5.8	6.12	7.06	4.18	6.13		Huh7-WT2	3.72	5.58

## Sheet: Panel D
Panel
				WT	ATG5KO
			EXPT 1	1.10736	0.213314
			EXPT 2	1.29649	0.195304
			EXPT 3	1.31029	0.159239
			Fold change of VPS35
			(Normalised to YFP-VPS29)

## Sheet: Panel F
				WT	ATG5KO
			EXPT 1	1.12764	0.228217
			EXPT 2	1.1713	0.214432
			EXPT 3	1.28846	0.196347
			Fold change of VPS26
			(Normalised to YFP-VPS29)
