# Supplementary material for: Noncanonical roles of ATG5 and membrane atg8ylation in retromer assembly and function
Source: eLife. 2025 Jan 7;13:RP100928. doi: 10.7554/eLife.100928 (PMC11706607; doi:10.7554/eLife.100928)
Supplement: Figure 8—source data 1. [file elife-100928-fig8-data1.xlsx]

## Sheet: Panel B
GLUT1 Puncta
Plate 1			Full Media (Ctrl)						LLOMe 1mM (30min)					Averages	U2OS-WT + Ctrl	ATG2-DKO + Ctrl	U2OS-WT + LLOME	ATG2-DKO + LLOME
U2OS-WT	17.77	19.35	20.15	20.29	18.82	21.83	49.82	50.32	50.04	45.72	45.17	48.1		Plate 1	19.7017	48.195	28.3833	48.0083
ATG2-DKO	29.46	27.19	27.08	28.86	32	25.71	48.36	52.93	49.74	48.61	43.63	44.78		Plate 2	21.73	42.655	27.4267	44.5233
														Plate 3	22.4683	44.27	29.5667	51.995
Plate 2			Full Media (Ctrl)						LLOMe 1mM (30min)					Plate 4	20.4983	43.9383	28.5817	48.7317
U2OS-WT	24.67	19.55	22.98	19.1	21.59	22.49	45.42	43.85	40.18	46.98	36.27	43.23		Plate 5	20.725	41.0383	31.7367	47
ATG2-DKO	28.51	24.12	24.54	28.14	30.77	28.48	49.72	43.04	46.33	37.44	44.88	45.73		Plate 6	20.9967	42.3383	29.91	48.05
Plate 3			Full Media (Ctrl)						LLOMe 1mM (30min)
U2OS-WT	22.15	21.01	26.08	23.47	20.04	22.06	42.48	47.01	43.2	43.7	42.11	47.12
ATG2-DKO	30	29.86	33.06	25.78	27.3	31.4	52.47	54.19	53.55	53.06	49.8	48.9
Plate 4			Full Media (Ctrl)						LLOMe 1mM (30min)
U2OS-WT	21.05	20.57	22.26	21.36	16.85	20.9	39.92	42.34	48.25	45.24	47.01	40.87
ATG2-DKO	27.55	28.73	30.56	33.18	26.74	24.73	49.78	56.72	48.3	49.61	44.1	43.88
Plate 5			Full Media (Ctrl)						LLOMe 1mM (30min)
U2OS-WT	17.34	19.38	18.56	24.64	25.39	19.04	41.32	41.19	41.11	43.72	35.21	43.68
ATG2-DKO	29.76	31.89	30.87	33.7	31.16	33.04	52.64	47.37	45.44	44.97	46.43	45.15
Plate 6			Full Media (Ctrl)						LLOMe 1mM (30min)
U2OS-WT	17.02	20.72	23.59	23.46	20.75	20.44	42.54	45.93	37.9	40.49	42.67	44.5
ATG2-DKO	29.89	31.35	27.66	32.71	29.18	28.67	55.44	50.44	46.63	47.72	45.14	42.93

## Sheet: Panel C
GLUT1-LAMP2 Overlap (%LAMP2)
Plate 1			Full Media (Ctrl)						LLOMe 1mM (30min)					Averages	U2OS-WT + Ctrl	ATG2-DKO + Ctrl	U2OS-WT + LLOME	ATG2-DKO + LLOME
U2OS-WT	13.99	15.14	15.5	15.15	14.67	15.45	30.31	30.81	32.36	31.71	30.78	32.46		Plate 1	14.9833	31.405	19.2233	27.05
ATG2-DKO	19.84	17.95	17.88	19.62	19.41	20.64	26.48	28.6	27.19	27.02	25.91	27.1		Plate 2	16.05	28.9533	17.9033	24.5567
														Plate 3	15.3617	28.635	19.1083	28.57
Plate 2			Full Media (Ctrl)						LLOMe 1mM (30min)					Plate 4	16.2133	29.0467	18.7883	28.9983
U2OS-WT	16.36	14.81	17.55	17.23	15.15	15.2	28.36	28.27	28.35	30.28	27.56	30.9		Plate 5	15.8167	27.7467	18.8467	26.95
ATG2-DKO	18.82	17.36	16.73	19.1	18.93	16.48	24.82	23.21	25.5	23.12	24.54	26.15		Plate 6	15.06	27.185	19.94	28.3517
Plate 3			Full Media (Ctrl)						LLOMe 1mM (30min)
U2OS-WT	15.55	17.35	16.05	13.87	14.05	15.3	26.69	28.04	28.85	29.26	27.18	31.79
ATG2-DKO	18.42	18.84	19.57	18.74	19.83	19.25	27.66	30.51	28.08	29.19	27.48	28.5
Plate 4			Full Media (Ctrl)						LLOMe 1mM (30min)
U2OS-WT	15.58	17.16	16.13	14.95	17.1	16.36	30.95	26.78	28.55	29.58	29	29.42
ATG2-DKO	18.47	17.59	19.62	19.89	18.36	18.8	25.83	29.74	26.72	29.58	29.57	32.55
Plate 5			Full Media (Ctrl)						LLOMe 1mM (30min)
U2OS-WT	14.68	16.37	15.19	15.46	15.72	17.48	25	27.55	27.59	29.27	26.58	30.49
ATG2-DKO	19.81	19.17	18.09	19.61	17.67	18.73	27.64	24.62	26.3	26.6	26.14	30.4
Plate 6			Full Media (Ctrl)						LLOMe 1mM (30min)
U2OS-WT	14.05	14.23	14.26	16.57	15.86	15.39	28.32	26.08	24.43	26.15	28.11	30.02
ATG2-DKO	20.66	19.41	19.47	20.72	18.55	20.83	27.88	28.3	29.24	30.18	27	27.51

## Sheet: Panel E
GLUT1 Puncta
Plate 1			Full Media (Ctrl)						LLOMe 1mM (30min)					Averages	Huh7-WT + Ctrl	VPS37-KO + Ctrl	Huh7-WT + LLOME	VPS37-KO + LLOME
Huh7-WT	9.82	9.61	11.96	9.46	10.43	12.45	26.23	26.36	18.19	20.84	23.64	22.26		Plate 1	10.6217	22.2483	22.92	32.0383
VPS37-KO	23.89	23.25	22.33	20.81	22.27	20.94	33.51	34.35	31.44	33.57	31.02	28.34		Plate 2	11.1733	20.605	25.09	33.9433
														Plate 3	12.4333	22.7367	21.8267	31.445
Plate 2			Full Media (Ctrl)						LLOMe 1mM (30min)					Plate 4	9.74667	19.5133	22.0783	26.5017
Huh7-WT	12.32	10.58	11.45	10.1	11.34	11.25	23.86	23.88	25.3	26.45	26.61	24.44		Plate 5	11.6183	21.71	24.7167	29.985
VPS37-KO	22.56	20.7	20.59	21.21	19.33	19.24	36.73	34.63	34.97	32.92	31.53	32.88		Plate 6	10.3	20.1033	22.4583	32.7383
Plate 3			Full Media (Ctrl)						LLOMe 1mM (30min)
Huh7-WT	12.04	11.55	12.12	12.09	13.38	13.42	24.68	21.66	14.78	20.41	23.13	26.3
VPS37-KO	24.64	21.09	24.8	23.23	22.78	19.88	33.66	26.39	32.54	32.65	32.5	30.93
Plate 4			Full Media (Ctrl)						LLOMe 1mM (30min)
Huh7-WT	7.87	9.84	8.95	10.43	9.78	11.61	16.77	19.31	21.57	24.89	25.7	24.23
VPS37-KO	26.49	21.13	16.67	18	19.99	14.8	29.39	30.36	25.26	27.75	23.47	22.78
Plate 5			Full Media (Ctrl)						LLOMe 1mM (30min)
Huh7-WT	11.07	10.69	12.37	11.9	12.01	11.67	25	24.32	22.38	26.2	23.69	26.71
VPS37-KO	25.42	19.7	23.97	23.57	18.22	19.38	33.86	29.45	28.76	31.75	28.59	27.5
Plate 6			Full Media (Ctrl)						LLOMe 1mM (30min)
Huh7-WT	11.96	10.14	11.36	7.46	10.91	9.97	20.2	21.96	27.94	23.99	13.84	26.82
VPS37-KO	24.68	23.42	16.96	22.6	19.68	13.28	31.74	34.25	34.51	34.9	32.17	28.86

## Sheet: Panel F
GLUT1-LAMP2 Overlap (%LAMP2)
Plate 1			Full Media (Ctrl)						LLOMe 1mM (30min)					Averages	Huh7-WT + Ctrl	VPS37-KO + Ctrl	Huh7-WT + LLOME	VPS37-KO + LLOME
Huh7-WT	5.77	5.9	6.37	6.24	6.37	6.69	12.77	12.37	10.12	10.47	11.44	11.24		Plate 1	6.22333	19.1117	11.4017	29.3767
VPS37-KO	19.95	19.14	18.07	19.2	19.15	19.16	30.32	30.69	29.01	29.08	28.14	29.02		Plate 2	5.895	19.1333	11.4783	29.12
														Plate 3	6.36	19.435	10.9167	28.245
Plate 2			Full Media (Ctrl)						LLOMe 1mM (30min)					Plate 4	5.99833	19.215	11.2383	25.69
Huh7-WT	6.7	5.64	5.95	5.58	5.87	5.63	11.66	10.91	11.75	11.93	11.91	10.71		Plate 5	6.16333	19.7483	11.93	26.8633
VPS37-KO	20.85	18.38	19.3	17.44	19.78	19.05	30.88	29.55	28.64	28.07	27.58	30		Plate 6	5.64833	20.2633	11.4383	28.1567
Plate 3			Full Media (Ctrl)						LLOMe 1mM (30min)
Huh7-WT	6.38	6.05	6.25	6.1	6.58	6.8	11.72	10.6	8.9	10.35	11.96	11.97
VPS37-KO	20.58	17.77	19.74	20.3	19.23	18.99	29.89	24.45	30.36	29.63	25.99	29.15
Plate 4			Full Media (Ctrl)						LLOMe 1mM (30min)
Huh7-WT	5.35	6.46	5.34	6.31	5.66	6.87	9.53	10.33	10.93	11.59	12.09	12.96
VPS37-KO	20.26	19.39	18.95	18.82	18.98	18.89	28.73	28.35	22.69	26.62	24.05	23.7
Plate 5			Full Media (Ctrl)						LLOMe 1mM (30min)
Huh7-WT	6.05	5.55	6.3	6.23	6.08	6.77	12.09	11.9	11.04	12.85	11.15	12.55
VPS37-KO	20.84	20.54	20.71	20.83	18.33	17.24	28.79	27.94	25.83	28.54	26.31	23.77
Plate 6			Full Media (Ctrl)						LLOMe 1mM (30min)
Huh7-WT	6.32	5.72	5.87	5.03	5.53	5.42	10.48	11.83	12.84	11.29	9.24	12.95
VPS37-KO	22.91	20.37	18.69	19.28	20.58	19.75	28.69	28.98	26.87	29.74	27.26	27.4
