# Supplementary figures and images for: Noncanonical roles of ATG5 and membrane atg8ylation in retromer assembly and function
Source: eLife journal article supplement (doi:10.7554/elife.100928), 2024-09-02

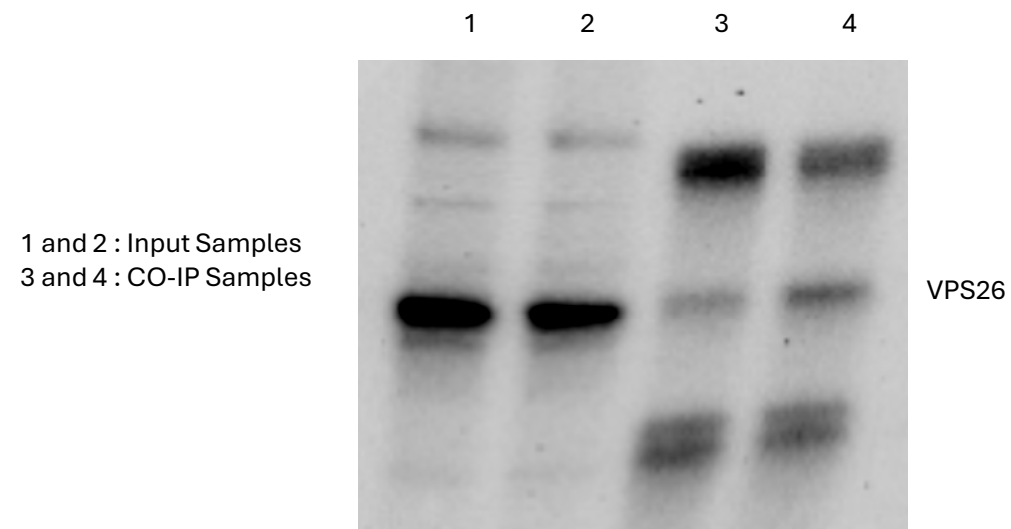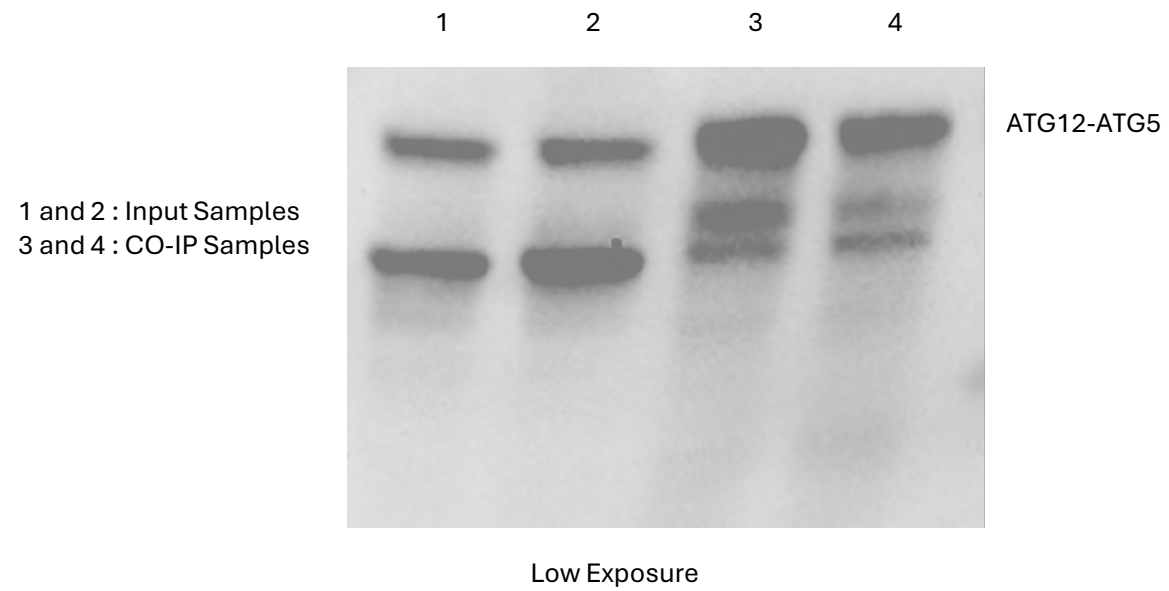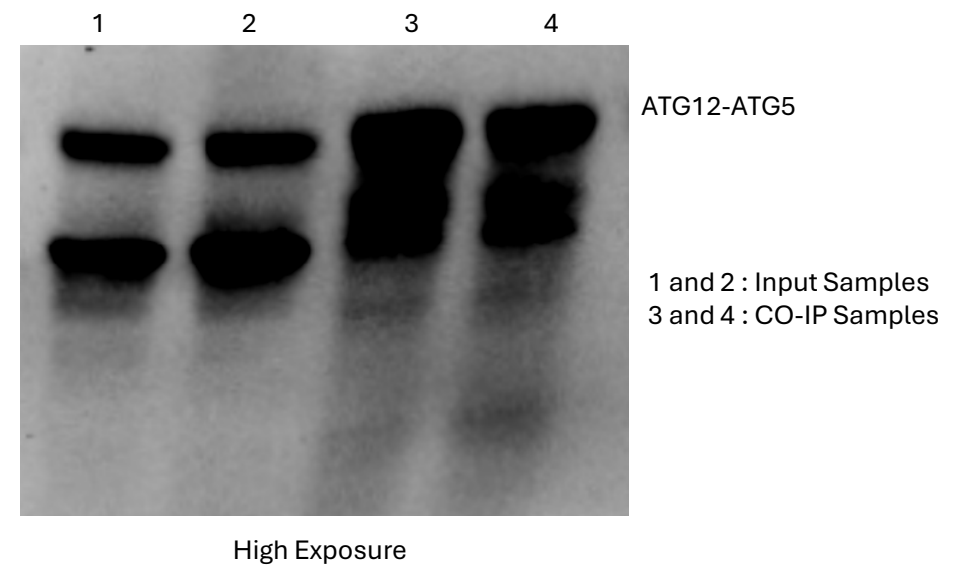

Supplement: fig1-data1 [file elife-100928-fig1-data1-v1.zip]

1 and 2 : CO-IP Samples  
3 and 4 : Input Samples

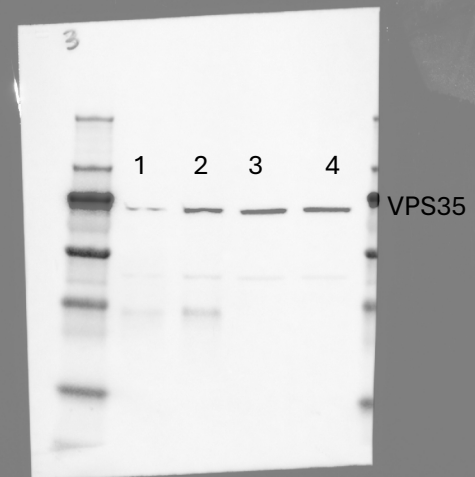

Supplement: fig1-data1 [file elife-100928-fig1-data1-v1.zip]

## LOW EXPOSURE

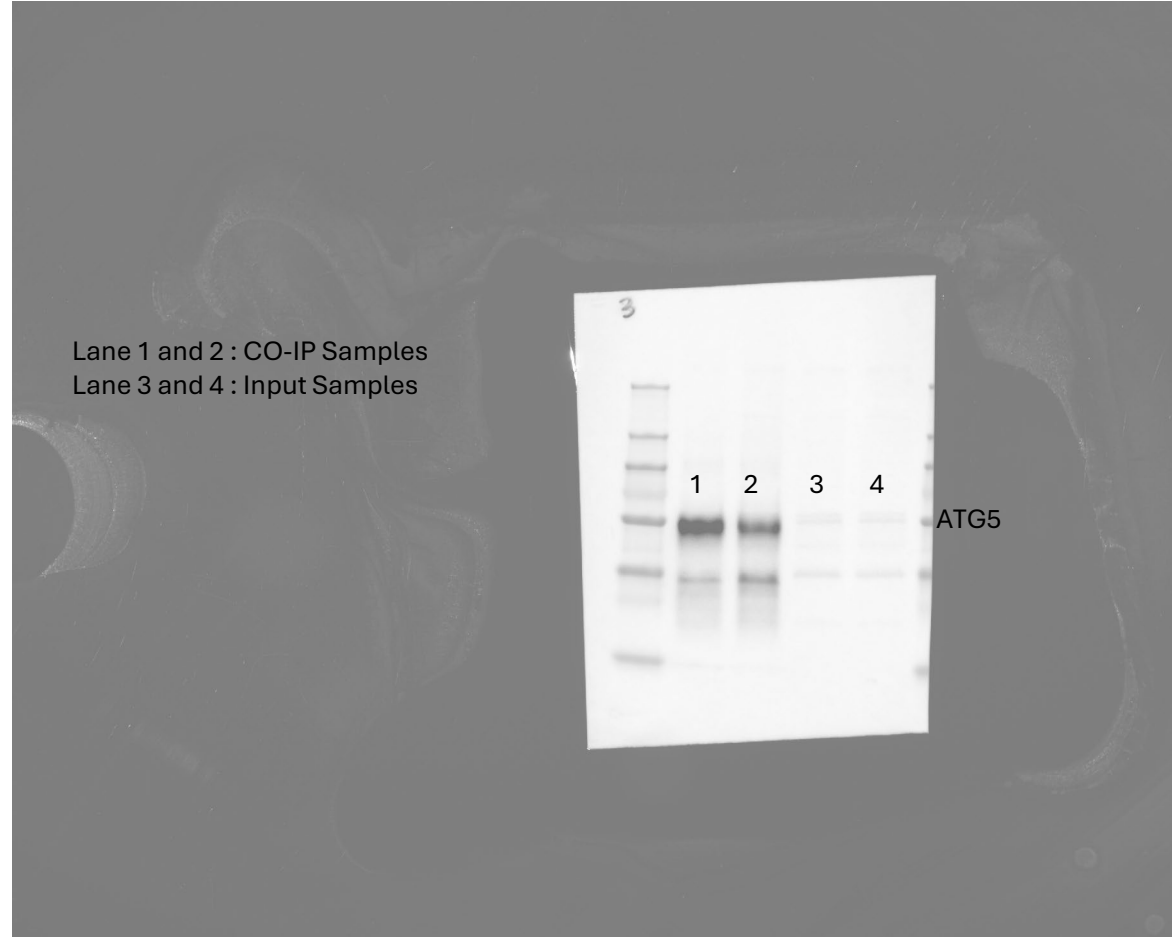

## HIGH EXPOSURE

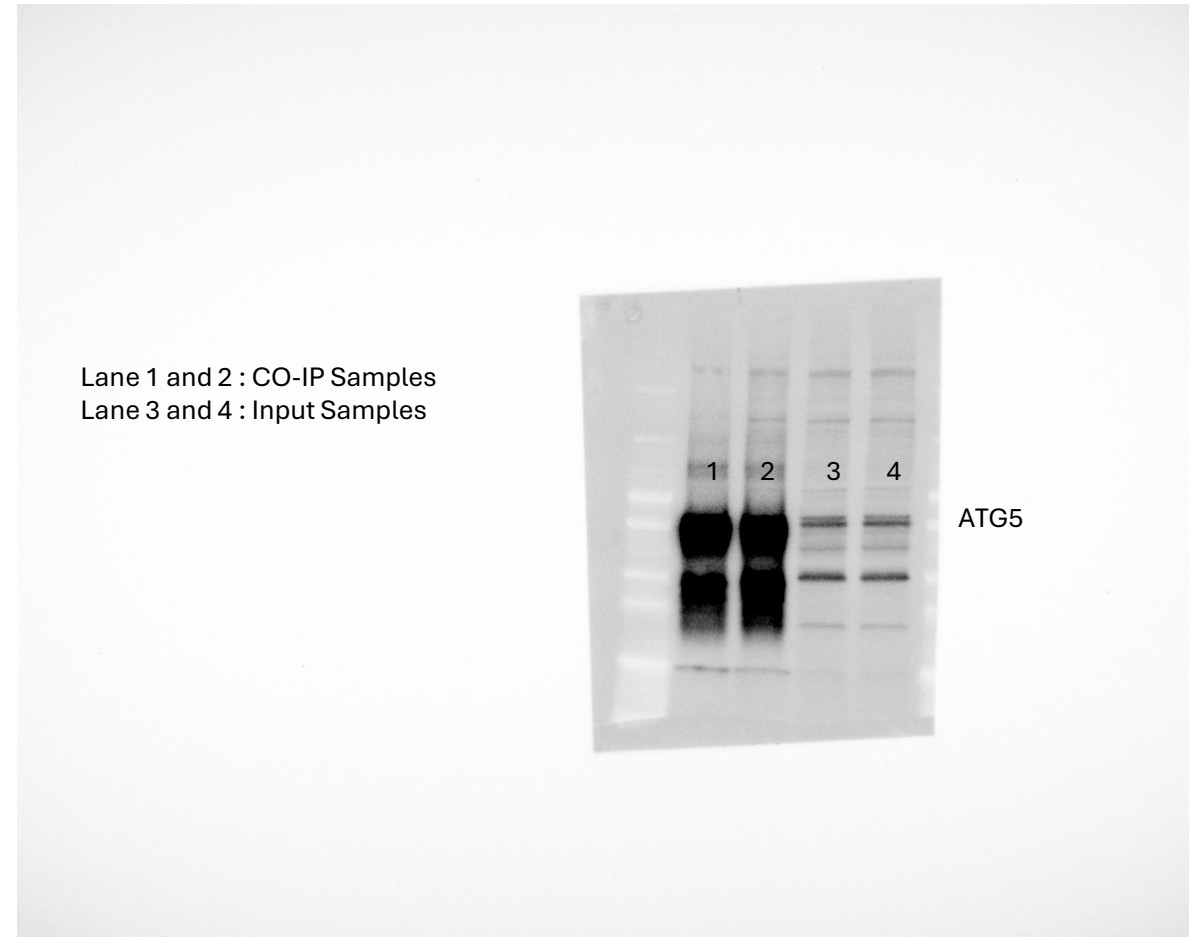

Supplement: fig1-data1 [file elife-100928-fig1-data1-v1.zip]

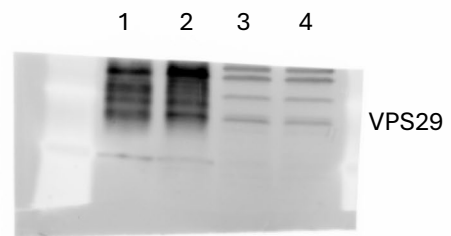

1 and 2 : CO-IP Samples  
3 and 4 : Input Samples

Supplement: fig1-data1 [file elife-100928-fig1-data1-v1.zip]

1 and 2 : CO-IP Samples  
3 and 4 : Input Samples

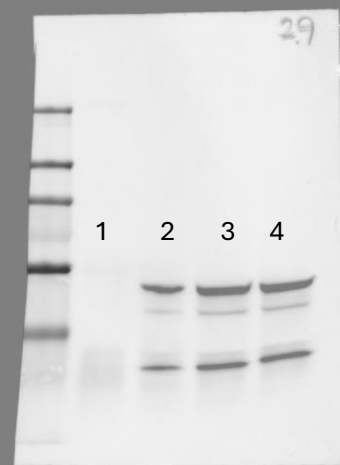

YFP-VPS29

Supplement: fig3-data1 [file elife-100928-fig3-data1-v1.zip]

1 to 4 : Lyso-IP Samples  
5 to 8 : Input Samples

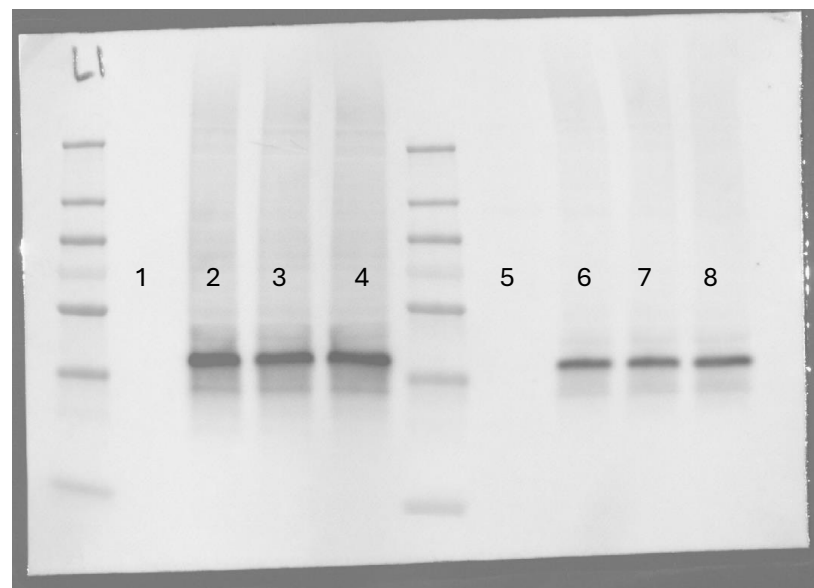

TMEM192-3xHA

Supplement: fig3-data1 [file elife-100928-fig3-data1-v1.zip]

1 and 2 : CO-IP Samples  
3 and 4 : Input Samples

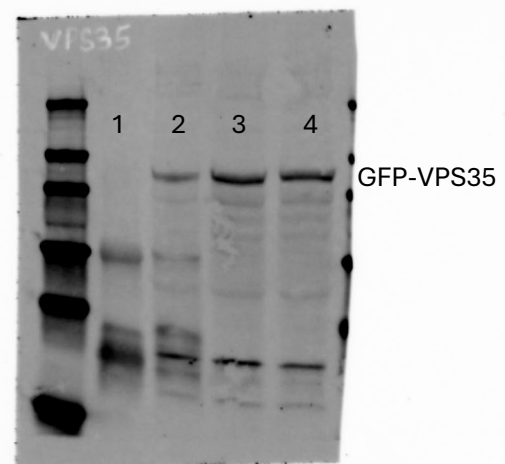

Supplement: fig3-data1 [file elife-100928-fig3-data1-v1.zip]

1 to 4 : Lyso-IP Samples  
5 to 8 : Input Samples

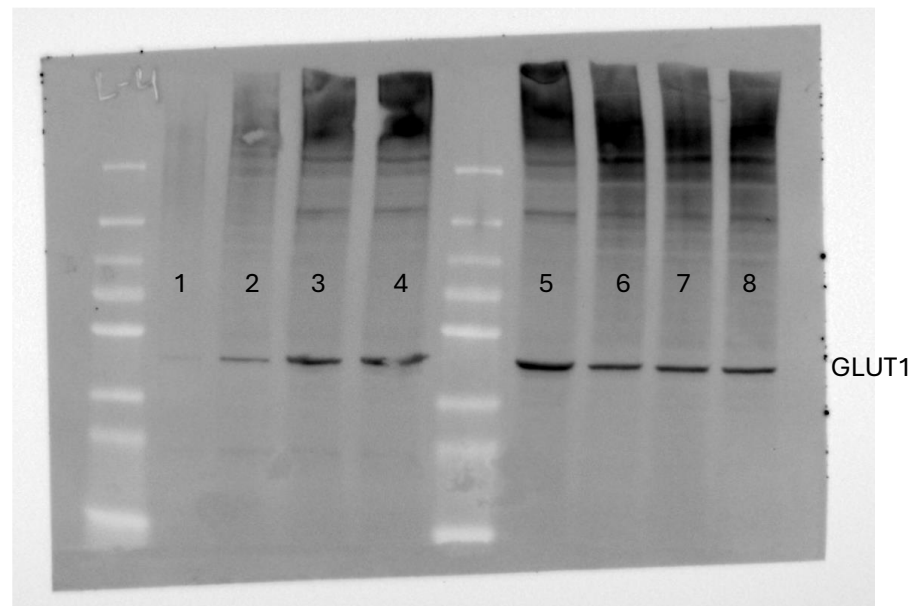

Supplement: fig3-data1 [file elife-100928-fig3-data1-v1.zip]

1 to 4 : Lyso-IP Samples  
5 to 8 : Input Samples

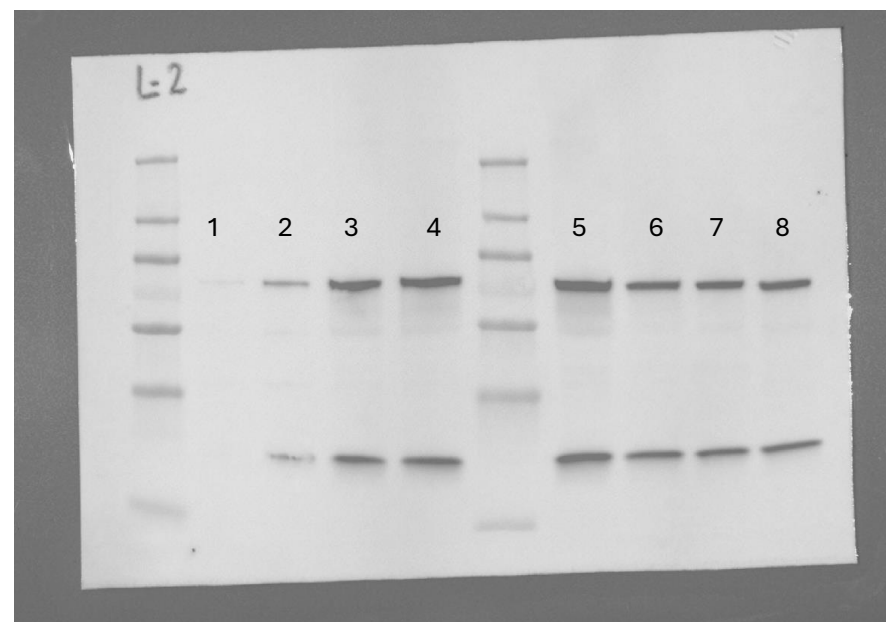

SNX27

Supplement: fig3-data1 [file elife-100928-fig3-data1-v1.zip]

1 to 3 : CO-IP Samples  
4 to 6 : Input Samples

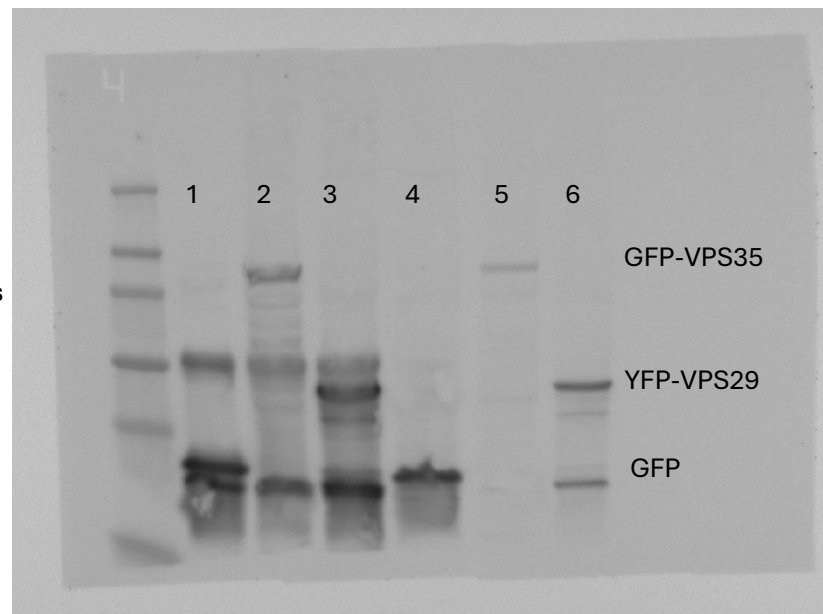

Supplement: fig3-data1 [file elife-100928-fig3-data1-v1.zip]

1 to 4 : Lyso-IP Samples  
5 to 8 : Input Samples

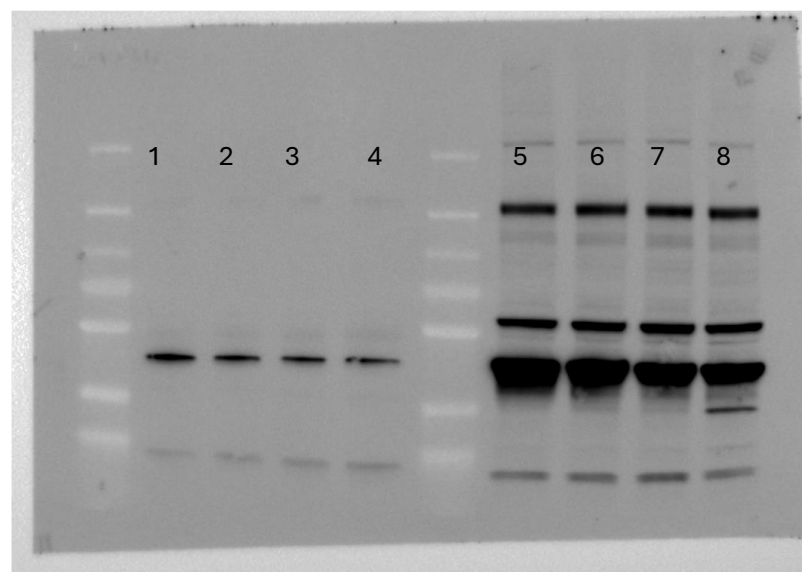

GM130 (Golgi)

PDI (ER)

Supplement: fig3-data1 [file elife-100928-fig3-data1-v1.zip]

1 to 4 : Lyso-IP Samples  
5 to 8 : Input Samples

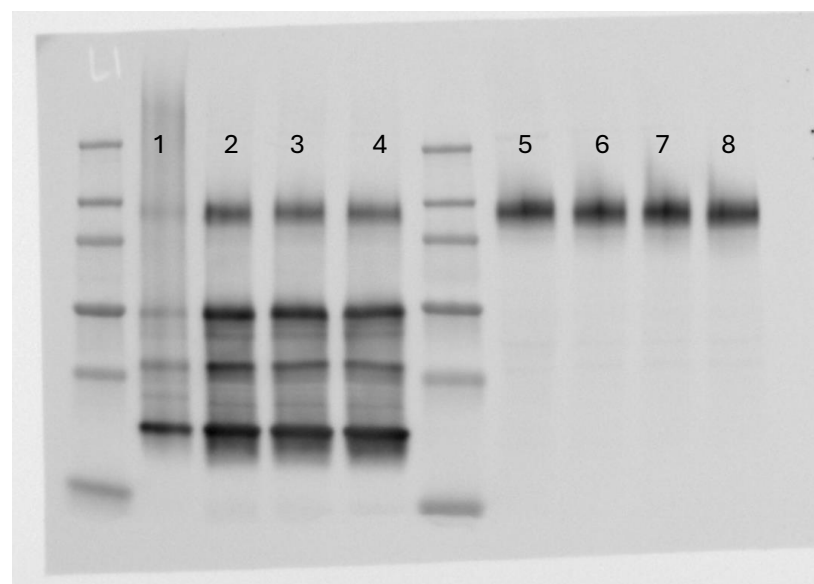

LAMP2

Supplement: fig3-data1 [file elife-100928-fig3-data1-v1.zip]

1 and 2 : CO-IP Samples  
3 and 4 : Input Samples

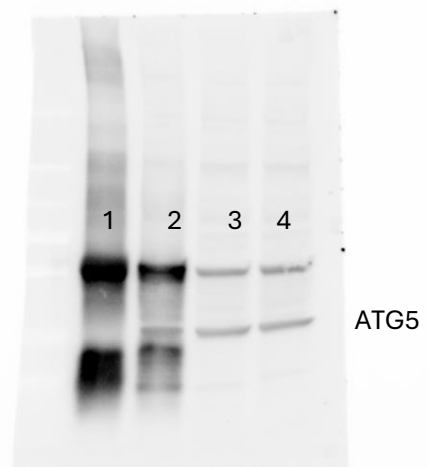

Supplement: fig3-data1 [file elife-100928-fig3-data1-v1.zip]

1 to 3 : CO-IP Samples  
4 to 6 : Input Samples

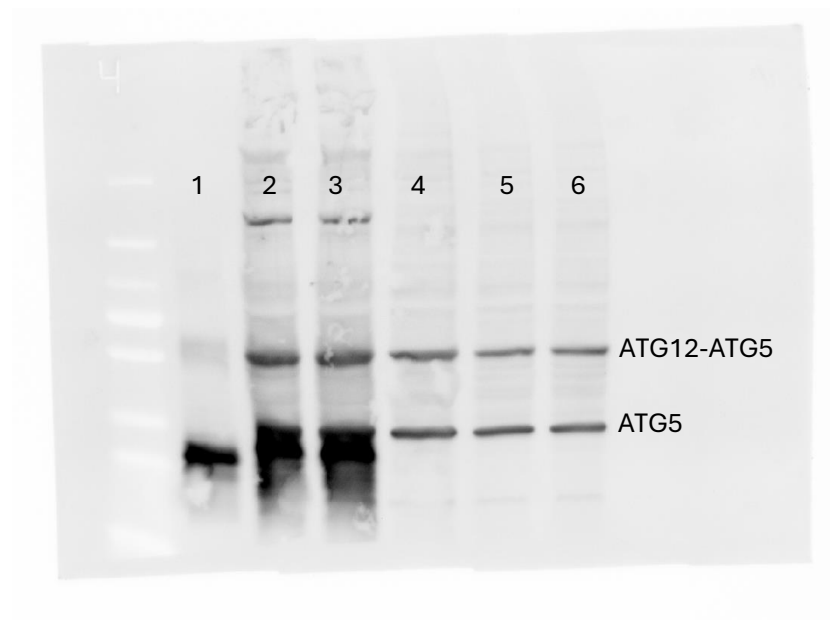

Supplement: fig3-data1 [file elife-100928-fig3-data1-v1.zip]

1 to 4 : Lyso-IP Samples  
5 to 8 : Input Samples

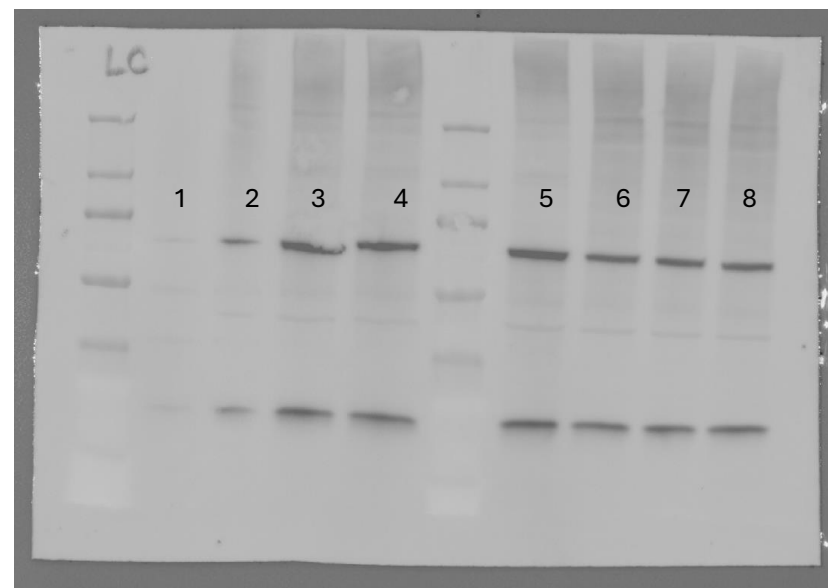

RAB7

Supplement: fig6-data1 [file elife-100928-fig6-data1-v1.zip]

1 to 4 : Lyso-IP Samples  
5 to 8 : Input Samples

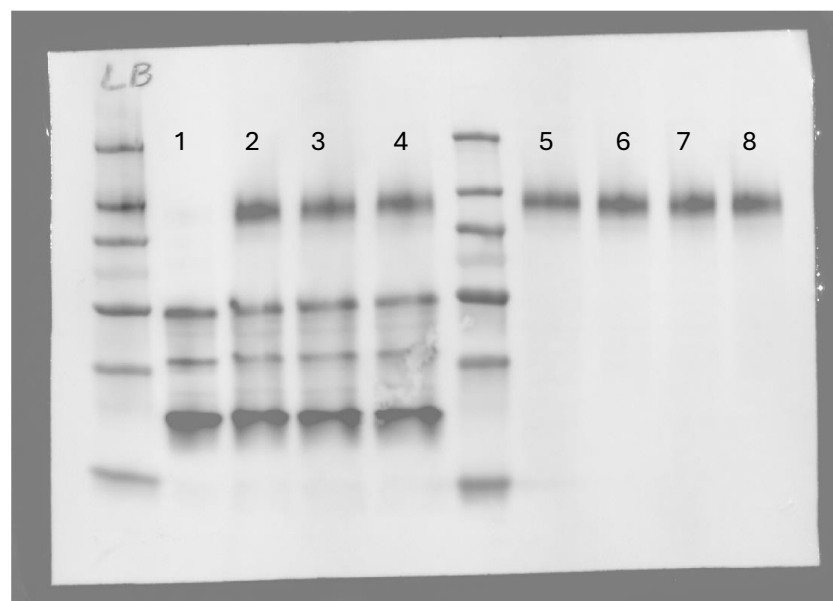

LAMP2

Supplement: fig6-data1 [file elife-100928-fig6-data1-v1.zip]

1 to 4 : Lyso-IP Samples  
5 to 8 : Input Samples

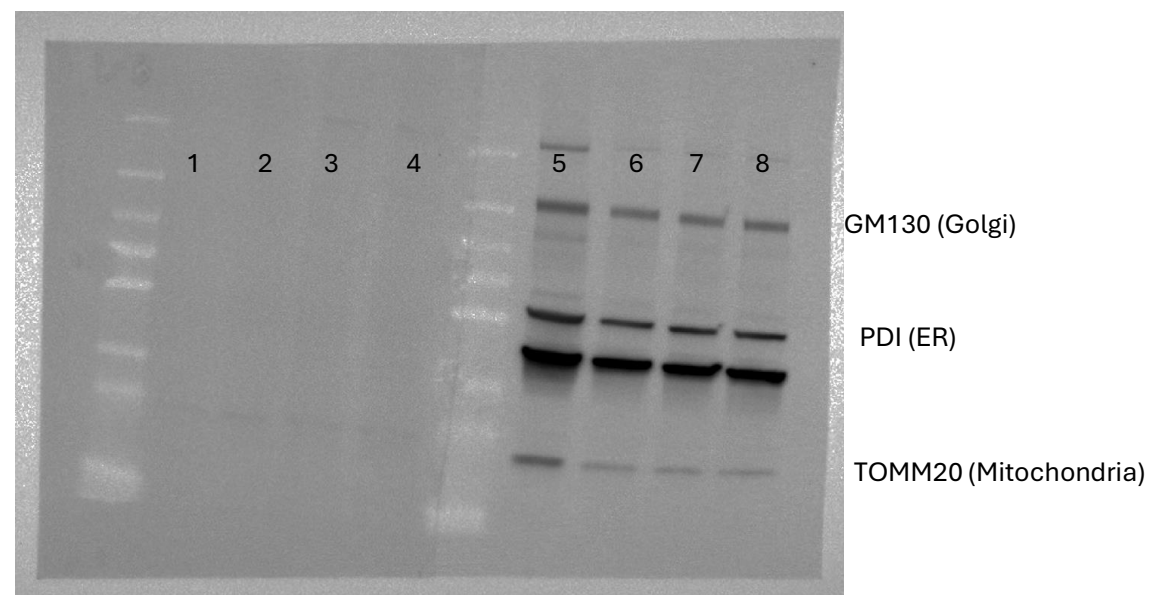

Supplement: fig6-data1 [file elife-100928-fig6-data1-v1.zip]

1 to 4 : Lyso-IP Samples  
5 to 8 : Input Samples

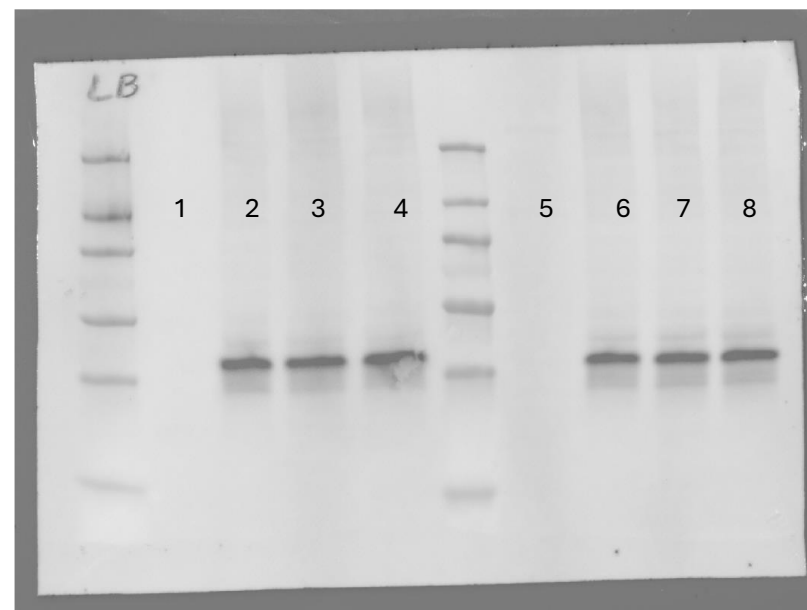

TMEM192-3xHA

Supplement: fig6-data1 [file elife-100928-fig6-data1-v1.zip]

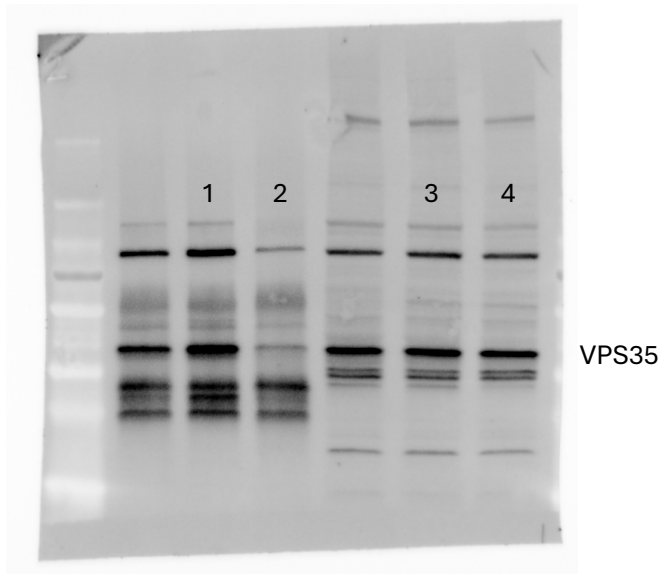

1 and 2 : CO-IP Samples  
3 and 4 : Input Samples

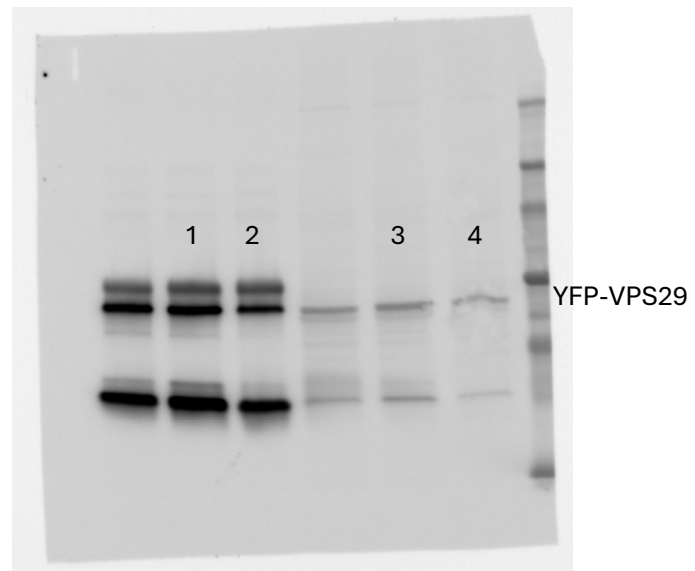

1 and 2 : CO-IP Samples  
3 and 4 : Input Samples

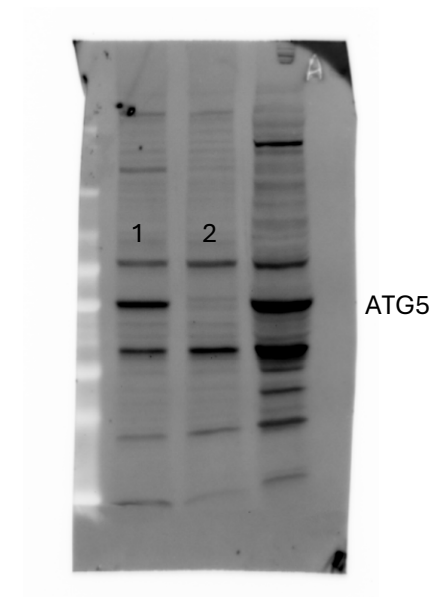

1 : HeLa-WT  
2 : HeLa ATG5-KO

Supplement: fig8-figsupp3-data1 [file elife-100928-fig8-figsupp3-data1-v1.zip]
